# Supplementary material
Source: ML conference proceedings conference paper supplement (https://proceedings.mlr.press/v139/tahmasbi21a.html)
Supplement: Supplementary file 1 [file tahmasbi21a-supp.zip]

## A. Pseudocode of STRSAGA

As shown in Figure 1 and Figure 2, DriftSurf calls a function  $\text{Update}(\mathbf{w}, \mathcal{S}, \mathbf{X}_t)$  that takes a model  $\mathbf{w}$ , a sample set  $\mathcal{S}$ , and a set of training points  $\mathbf{X}_t$ . We let  $\rho$  be the computational power available at each time step; for an SGD-based algorithm,  $\rho$  is the number of gradients that can be computed in a time step. The Update function performs  $\rho$  updates to  $\mathbf{w}$  and returns the resulting model; as a side effect, it also updates  $\mathcal{S}$ .

In this paper, we primarily use STRSAGA (Jothimurugesan et al., 2018), shown in Algorithm 4, for our Update function. STRSAGA differs from SGD (Algorithm 3) in that (i) it uses variance-reduced update steps that result in faster convergence, and (ii) it handles streaming data that do not arrive at a steady rate by controlling the rate at which its sample set grows. (In this paper, we only consider data that arrive at a fixed rate at each time step, but by using STRSAGA, the results can be readily extended to Poisson and other arrival distributions.) In STRSAGA, data points are not sampled from the entire available stream segment, but instead from a separately maintained sample set. Newly arriving data are first added to a buffer (called `WaitingRoom`), and then points are moved from `WaitingRoom` to the sample set at a controlled rate “to ensure that the optimization error on the subset that has been trained is balanced with the statistical error of the effective sample size” (Jothimurugesan et al., 2018). The implementation of STRSAGA we use in this paper uses the “alternating schedule” in its sampling.

---

**Algorithm 3**  $\text{Update}(\mathbf{w}, \mathcal{S}, \mathbf{X}_t)$ : Process of updating parameters  $\mathbf{w}$  using SGD, given sample set  $\mathcal{S}$  and newly arrived data points  $\mathbf{X}_t$

---

```
//  $\rho$  is the computational power and determines the number of update steps that can be performed
//  $\eta$  is the learning rate
Add  $\mathbf{X}_t$  to  $\mathcal{S}$ 
for  $j \leftarrow 1$  to  $\rho$  do
  Sample a point  $p$  uniformly from  $\mathcal{S}$ 
   $g \leftarrow \nabla f_p(\mathbf{w})$  { $f_p$  is the loss function at  $p$ }
   $\mathbf{w} \leftarrow \mathbf{w} - \eta \cdot g$ 
end for
return  $\mathbf{w}$ 
```

---



---

**Algorithm 4**  $\text{Update}(\mathbf{w}, \mathcal{S}, \mathbf{X}_t)$ : Process of updating parameters  $\mathbf{w}$  using STRSAGA, given sample set  $\mathcal{S}$  and newly arrived data points  $\mathbf{X}_t$

---

```
//  $\rho$  is the computational power and determines the number of update steps that can be performed
//  $\eta$  is the learning rate
Add  $\mathbf{X}_t$  to WaitingRoom {WaitingRoom is the set of training points not added to  $\mathcal{S}$  yet}
for  $j \leftarrow 1$  to  $\rho$  do
  if WaitingRoom is non-empty &  $j$  is even then
    Move a single point,  $p$ , from WaitingRoom to  $\mathcal{S}$ 
     $\alpha(p) \leftarrow 0$  { $\alpha(p)$  is the prior gradient of  $p$ , initialized to 0}
  else
    Sample a point  $p$  uniformly from  $\mathcal{S}$ 
  end if
   $A \leftarrow \sum_{x \in \mathcal{S}} \alpha(x) / |\mathcal{S}|$  { $A$  is the average of all gradients and can be maintained incrementally}
   $g \leftarrow \nabla f_p(\mathbf{w})$  { $f_p$  is the loss function at  $p$ }
   $\mathbf{w} \leftarrow \mathbf{w} - \eta(g - \alpha(p) + A)$ 
   $\alpha(p) \leftarrow g$ 
end for
return  $\mathbf{w}$ 
```

---

The time complexity of Algorithms 3 and 4 is on the order of  $\rho$  times the cost of a gradient computation with respect to a single data point. Each gradient computation is typically  $O(d)$  for model parameter dimension  $d$ . The space complexity of Algorithm 3 is  $O(D(|\mathcal{S}| + |\mathbf{X}_t|) + d)$  to store the samples and model parameters, where  $D$  is the dimension of the data. The space complexity of Algorithm 4 incurs an additive  $O(d(|\mathcal{S}| + |\mathbf{X}_t|))$  to store the prior gradients  $\alpha(p)$  for each data point (for linear models, this cost is reduced to  $O(|\mathcal{S}| + |\mathbf{X}_t|)$  since each gradient is a scalar multiple of the corresponding

Table 4: Summary of notation used in the analysis

|                |                                                                                                                          |
|----------------|--------------------------------------------------------------------------------------------------------------------------|
| $\mathbf{X}_t$ | Data points arriving at time step $t$                                                                                    |
| $m$            | $=  \mathbf{X}_t $ , the number of points arriving at each $t$                                                           |
| $r$            | length of the reactive state (in time steps)                                                                             |
| $W$            | length of the windows $W1$ and $W2$ (in time steps)                                                                      |
| $\alpha$       | the exponent in the statistical error bound $\mathcal{H}(n) = hn^{-\alpha}$                                              |
| $h$            | the constant factor in the statistical error bound $\mathcal{H}(n) = hn^{-\alpha}$                                       |
| $\delta$       | the threshold in condition 2 for entering the reactive state                                                             |
| $\delta'$      | the threshold in condition 3 for switching the model at the end of the reactive state                                    |
| $\Delta$       | the magnitude of a given sustained performance-degrading drift                                                           |
| $p_s$          | upper bound on the probability DriftSurf enters the reactive state in a stationary environment                           |
| $p_d$          | lower bound on the probability DriftSurf enters the reactive state in the presence of drift                              |
| $q_s$          | upper bound on the probability DriftSurf switches the model at the end of the reactive state in a stationary environment |
| $q_d$          | lower bound on the probability DriftSurf switches the model at the end of the reactive state in the presence of drift    |

data point).

## B. Proofs from the Analysis of DriftSurf

This section contains proof details from the analysis of DriftSurf (§5). As noted in §5, we make the following assumptions throughout our analysis. We assume that  $\mathcal{H}(n) = hn^{-\alpha}$ , for a constant  $h$  and  $1/2 \leq \alpha \leq 1$ , is an upper bound on the statistical error over a set of data points of size  $n$ . Next, the base learner reduces the sub-optimality over its sample set to within the statistical error bound (Assumption 1, which is repeated below).

**Assumption 1.** *Let  $t_0$  be the time the base learner  $B$  was initialized. At each time step  $t$ ,*

$$\mathbb{E}[\text{SUBOPT}_{\mathcal{S}_{t_0,t}}(B)] \leq \mathcal{H}(n_{t_0,t}).$$

Let  $t_{d_1}, t_{d_2}, \dots$  denote the sequence of time steps at which a drift occurs. We assume that each drift at  $t_{d_i}$  is abrupt (i.e., the distribution changes across a single time step)—this is solely for the analysis, as our algorithm more generally applies to gradual drifts, as our experimental results show. Further, we assume for the analysis that each drift induces sustained performance-degradation in DriftSurf (Assumption 2, which is repeated below). Note if there is only one stored frozen model  $\mathbf{w}_{b1}$  associated with the predictive model at the time of the drift (because the second window has not started yet), then Assumption 2 applies only to  $\mathbf{w}_{b1}$ . Also note each drift magnitude  $\Delta$  for the drift at  $t_{d_i}$  may be distinct, and the dependence on  $i$  is suppressed notationally.

**Assumption 2.** *For the drift at time  $t_{d_i}$ , and for both frozen models  $\mathbf{w}_b \in \{\mathbf{w}_{b1}, \mathbf{w}_{b2}\}$  stored at  $t_{d_i}$ , we have  $\mathcal{R}_{\mathbf{X}_t}(\mathbf{w}_{t-1}) > \mathcal{R}_b$  for each time  $t_{d_i} < t < t_{d_{i+1}}$  as long as DriftSurf has not recovered. Furthermore, we denote  $\Delta$  to be the magnitude of the drift where  $\Delta = \min_{\mathbf{w}_b} (\mathcal{R}_J(\mathbf{w}_b) - \mathcal{R}_I(\mathbf{w}_b))$  where  $I$  denotes the distribution at the time  $t_{d_i} - 1$  before the drift, and  $J$  denotes the distribution at  $t_{d_i}$ .*

We assume that all loss functions  $f_{\mathbf{x}}$  are bounded  $[0, 1]$ , that  $R_{I_t}^* = \inf_{\mathbf{w} \in \mathcal{F}} \mathcal{R}_{I_t}(\mathbf{w}) = 0$  for each distribution  $I_t$ , that the batch size  $m > 16/\delta'$ , that each drift magnitude  $\Delta > \delta$ , and that the window size  $W$  for storing a frozen model is upper bounded by both  $\frac{1}{2} \exp(\frac{1}{2}m\delta^2)$  and  $\frac{1}{2} \exp(\frac{1}{2}m(\Delta - \delta)^2)$  for each drift magnitude  $\Delta$ . Finally, we assume that for each frozen model  $\mathbf{w}_b$  that yielded a minimal observed risk  $\mathcal{R}_b$ , that its expected risk is at least as good as its expectation; i.e., when  $\mathbf{w}_b$  is trained over  $n$  points, then  $\mathcal{R}(\mathbf{w}_b) < \mathbb{E}[\mathcal{R}(\mathbf{w}')] for a model  $\mathbf{w}'$  trained over  $n$  points from the same distribution.$

Table 4 summarizes the notation used in this section.

We first establish a couple of preliminary facts we will use.

**Observation 1.** *Suppose the base learner  $B$  trains a model  $\mathbf{w}$  over a stream segment  $\mathcal{S} \sim I^n$ . Then the expected risk is bounded  $\mathbb{E}[\mathcal{R}_I(\mathbf{w}) - \mathcal{R}_I^*] \leq 2\mathcal{H}(n)$ , where  $\mathcal{R}_I^* = \inf_{\mathbf{w}' \in \mathcal{F}} \mathcal{R}_I(\mathbf{w}')$ .*

Observation 1 follows from Assumption 1 and applying Equation 1 twice.

Each loss function  $\ell_x$  is bounded in  $[0, 1]$ , and hence, is sub-Gaussian with parameter  $\sigma = 1/2$ . Therefore, the sum of independent losses has the following concentration.

**Theorem 2.** (Hoeffding Bound) Suppose a model  $\mathbf{w}$  is trained over  $\mathcal{S} \sim I^{n_1}$ . The empirical risk on the test set  $\mathcal{T} \sim J^{n_2}$  is bounded relative to the expected risk on the distribution  $J$  as

$$\Pr[\mathcal{R}_{\mathcal{T}}(\mathbf{w}) > \mathcal{R}_J(\mathbf{w}) + \epsilon] \leq \exp(-2n_2\epsilon^2)$$

and

$$\Pr[\mathcal{R}_{\mathcal{T}}(\mathbf{w}) < \mathcal{R}_J(\mathbf{w}) - \epsilon] \leq \exp(-2n_2\epsilon^2).$$

We will also use the following fact about sub-Gaussian random variables:

**Theorem 3.** For a sequence (not necessarily independent) of zero-mean random variables  $Z_1, Z_2, \dots, Z_k$ , each sub-Gaussian with parameter  $\sigma$ , the maximum is bounded

$$\Pr[\max Z_i \geq \sqrt{2\sigma^2(\log k + \epsilon)}] \leq \exp(-\epsilon).$$

In the remainder of this section we complete the proofs for the results in §5 that establish the conditions under which DriftSurf is risk-competitive with Aware both in a stationary environment and in the presence of abrupt drifts.

### B.1. In a Stationary Environment

In §5.1, we considered only the stationary environment during the time  $1 < t < t_{d_1}$  before any drifts. In this section, we generalize the results to the stationary environment for any time  $t_{d_i} + r_i \leq t < t_{d_{i+1}}$ , where  $r_i$  is the recovery time for the drift at  $t_{d_i}$ . We refer to such a time period as a *recovered state*, in which each model of DriftSurf is trained solely over points from the newest distribution.

**Lemma 6.** (Generalized statement of Lemma 1.) In a recovered state, the probability of entering the reactive state is upper bounded by bounded by  $p_s = 2 \exp(-\frac{1}{8}m\delta^2)$ .

*Proof.* Let  $I$  denote the distribution that each batch is sampled from at each time since the beginning of the first stable state corresponding to the recovered state that DriftSurf is in. The best observed risk  $\mathcal{R}_b$  (and the corresponding frozen model  $\mathbf{w}_b$ ) is one of the observed empirical risks  $\mathcal{R}_{\mathbf{X}_i}(\mathbf{w}_{i-1})$  from the latest time step  $i = t$  to at most  $i = t - 2W$  time steps ago. Each empirical risk  $\mathcal{R}_{\mathbf{X}_i}(\mathbf{w}_{i-1})$  is the sum of independent sub-Gaussians and is also sub-Gaussian with  $\sigma = \frac{1}{2\sqrt{m}}$ . Applying Theorem 3 on the sequence  $Z_i = \mathcal{R}_I(\mathbf{w}_{i-1}) - \mathcal{R}_{\mathbf{X}_i}(\mathbf{w}_{i-1})$ , we have with probability  $1 - \exp(-\epsilon_1)$ ,

$$Z_b = \mathcal{R}_I(\mathbf{w}_b) - \mathcal{R}_b \leq \sqrt{\frac{1}{2m}(\log 2W + \epsilon_1)}.$$

Furthermore, by Theorem 2 (Hoeffding Bound), with probability  $1 - \exp(-2m\epsilon_2^2)$ ,

$$\mathcal{R}_{\mathbf{X}_t}(\mathbf{w}_b) \leq \mathcal{R}_I(\mathbf{w}_b) + \epsilon_2.$$

Choosing  $\epsilon_1 = 2m\epsilon_2^2 = m\delta^2/8$ , we have with probability at least  $1 - p_s = 1 - (\exp(-\epsilon_1) + \exp(-2m\epsilon_2^2))$ , that  $\mathcal{R}_{\mathbf{X}_t}(\mathbf{w}_b) - \mathcal{R}_b \leq \delta$ , using the triangle inequality and the assumption  $2W < \exp(\frac{1}{2}m\delta^2)$ .  $\square$

**Corollary 2.** In a recovered state, if DriftSurf enters the reactive state, then with probability at least  $1 - p_s^r$  it will exit the reactive state early.

*Proof.*

$$\Pr[\text{early exit}] = \Pr\left[\bigcup_{i=1}^{i=r} \text{early exit after } i \text{ time steps}\right] \geq \sum_{i=1}^r (1 - p_s)p_s^{i-1} = (1 - p_s)\left(\frac{p_s^r - 1}{p_s - 1}\right) = 1 - p_s^r.$$

$\square$

The bound  $p_s$  for entering the reactive state is a constant, which by itself, leads to only a constant lower bound asymptotically on the expected age of the model for a standalone drift detection algorithm based on condition 2, which we later show in Lemma 8. The key to DriftSurf maintaining asymptotically more points is that the bound  $q_s$  for switching the model at the end of the reactive state decays as the age of the frozen model increases, which we show next in Lemma 7. In the proof we will use the following theorem (Bennett's inequality).

**Theorem 4.** (Bennett's inequality) *Let  $X_1, X_2, \dots, X_n$  be independent zero-mean random variables such that  $|X_i| \leq M$  and let  $\sigma^2 = \frac{1}{n} \sum_{i=1}^n \text{Var}(X_i)$ . Then*

$$\Pr \left[ \frac{1}{n} \sum_{i=1}^n X_i \geq \epsilon \right] \leq \exp \left( -\frac{n\sigma^2}{M^2} h \left( \frac{M\epsilon}{\sigma^2} \right) \right),$$

where  $h(u) = (1+u) \log(1+u) - u$ .

**Lemma 7.** (Generalized statement of Lemma 2.) *In a recovered state, if DriftSurf enters the reactive state, the probability of switching to the reactive model at the end of the reactive state is bounded by  $q_s = c_1/\beta^2$  for  $\beta > c_2$ , where  $\beta$  is the number of time steps between the initialization of the model  $\mathbf{w}_b$  and the time it was frozen, and the constants  $c_1 = (2h/m^\alpha)^{mr\delta'/4}$  and  $c_2 = \frac{1}{m}(2h/\delta')^{1/\alpha}$ .*

*Proof.* Let  $I$  denote the distribution that each batch is sampled from in the current recovered state. For the model  $\mathbf{w}_b$  which obtained the minimal observed risk  $\mathcal{R}_b$  within its window, by the assumption that its risk is less than the expectation, we have  $\mathcal{R}_I(\mathbf{w}_b) \leq 2\mathcal{H}(m\beta)$ , using Observation 1 and the assumption  $\mathcal{R}_I^* = 0$ .

We apply Theorem 4 (Bennett's inequality) on  $\mathcal{R}_T(\mathbf{w}_b) - \mathcal{R}_I(\mathbf{w}_b)$ . For risk bounded in  $[0, 1]$ , we have that  $\text{Var}(\mathcal{R}_I(\mathbf{w}_b)) \leq \mathbb{E}[\mathcal{R}_I(\mathbf{w}_b)] \leq 2\mathcal{H}(m\beta)$ . Therefore,  $\mathcal{R}_T(\mathbf{w}_b) < 2\mathcal{H}(m\beta) + \delta'/2$  with probability  $1 - \exp \left( -mr\sigma^2 h \left( \frac{\delta'}{2\sigma^2} \right) \right) \geq 1 - c_1/\beta^2$ , using the assumption that  $m > 16/\delta'$ .

Note that for  $\beta > c_2$ , we have  $2\mathcal{H}(m\beta) < \delta'/2$ . Therefore, with probability  $1 - c_1/\beta^2$ ,

$$\begin{aligned} \mathcal{R}_T(\mathbf{w}'_f) - \mathcal{R}_T(\mathbf{w}_b) + \delta' &\geq \mathcal{R}_T(\mathbf{w}'_f) - (2\mathcal{H}(m\beta) + \delta'/2) + \delta' \\ &> \mathcal{R}_T(\mathbf{w}'_f) - \delta' + \delta' \\ &\geq 0, \end{aligned}$$

again using the fact that the risk is bounded in  $[0, 1]$ . □

We can now prove Corollary 3 to bound the size of the predictive model's sample set.

**Corollary 3.** (Generalized statement of Corollary 1.) *Let  $t_r$  be the time step DriftSurf enters a recovered state after a drift at time  $t_{d_r}$ . With probability  $1 - \epsilon$ , the size of the sample set  $\mathcal{S}$  for the predictive model in the stable state is larger than  $n_{t_r, t}/2$  at any time step  $t_r + 2W + c_4/(\epsilon - c_3) \leq t < t_{d_{i+1}}$ , where  $n_{t_r, t}$  is the total number of data points that arrived from time  $t_r$  until time  $t$ , and constants  $c_3 = c_1((c_2 + W) - 1/c_2)p_s$  and  $c_4 = (2c_3 - 8)c_1^2 p_s^2 + 6c_1 p_s$  (where  $c_1$  and  $c_2$  are the constants in Lemma 2 (same as in Lemma 7)).*

*Proof.* Let  $t' = t - t_r$ . Let  $\beta_j$  denote the age of the predictive model at time  $t_r + j$ . For  $t' < t_{d_{i+1}}$ , DriftSurf is in a recovered state, and so the probability of discarding the predictive model (entering the reactive state, not exiting early, and changing to the reactive model) at each time step  $t_r + j$  can be bounded in terms of  $p_s$  and  $q_s$  as  $\Pr[\text{discard at } t_r + j | \beta_j] \leq p_s^{r+1} q_s(\max(0, \beta_j - 2W))$ , since the frozen model is at most  $2W$  time steps behind the predictive model. To ensure the probability of switching the model is well defined, let  $q'_s(x) = c_1/x^2$  for  $x > c_2 + 2W$ , and  $q'_s(x) = 1$  for  $x \leq c_2 + 2W$ .

For simplicity, we bound  $\Pr[\text{discard at } t_r + j | \beta_j] \leq p_s q'_s(\beta_j - 2W)$ . Therefore,

$$\begin{aligned}
 \Pr[\beta_{t'} > t'/2] &\geq \Pr[\text{do not discard the model between } t'/2 \text{ and } t'] \\
 &\geq \prod_{j \in (t'/2, t']} \Pr[\text{not discard at } j | \beta_j \geq j - t'/2] \\
 &\geq 1 - \sum_{j=t'/2+1}^{t'} \Pr[\text{discard at } j | \beta_j \geq j - t'/2] \\
 &\geq 1 - \sum_{j=t'/2+1}^{t'} p_s q'_s(j - t'/2 - 2W) \\
 &= 1 - \sum_{i=1}^{t'/2} p_s q'_s(i - 2W),
 \end{aligned}$$

where the third line is Weierstrass' inequality. The last sum is the lower Riemann sum of a decreasing function of the interval  $I = (0, t'/2]$  into unit subintervals, which is upper bounded by the area over  $I$ . Continuing,

$$\begin{aligned}
 \Pr[\beta_{t'} > t'/2] &\geq 1 - \int_0^{t'/2} p_s q'_s(x - 2W) dx \\
 &\geq 1 - (c_2 + 2W)p_s - c_1 p_s \left[ \frac{-1}{x - 2W} \right]_{c_2+2W}^{t'/2},
 \end{aligned}$$

which is lower bounded by  $1 - \epsilon$  whenever  $t' > 2W + c_4/(\epsilon - c_3)$ .  $\square$

Similarly, we can compare the expected value of the age  $\beta$  of the predictive model of DriftSurf to the expected value of the age  $\gamma$  of the predictive model in the standalone drift detection algorithm that resets the model whenever condition 2 holds.

**Lemma 8.** (Generalized statement of Lemma 3.) *Let  $t_r$  be the time step DriftSurf enters a recovered state after a drift at time  $t_{d_i}$ . At time  $t$ , let  $\beta$  be the age of the predictive model in DriftSurf and let  $\gamma$  be the age of the model of standalone drift detection. For  $t_r + (2W + \frac{2c_4}{1-2c_3}) < t < t_{d_{i+1}}$ ,  $\mathbb{E}[\beta] > (t - t_r)/4$ . Meanwhile,  $\mathbb{E}[\gamma] \geq \frac{1}{p_s} - o(1)$  as  $t \rightarrow \infty$  (i.e., in the absence of future drifts after  $t_{d_i}$ ).*

*Proof.* Choosing  $\epsilon = 1/2$  in the proof of 3 gives the bound on  $\mathbb{E}[\beta]$ . To show the bound for standalone drift detection, let  $t' = t - t_r$ , and recall that at every time step in a recovered state, the probability of detecting a drift is upper bounded by the constant  $p_s$  by Lemma 6. Therefore,

$$\begin{aligned}
 \mathbb{E}[\gamma] &= \sum_{k=0}^{t'-1} \Pr[\gamma > k] \\
 &\geq \sum_{k=0}^{t'-1} (1 - p_s)^k \\
 &= \frac{1 - (1 - p_s)^{t'}}{p_s}.
 \end{aligned}$$

$\square$

## B.2. In Presence of Abrupt Drifts

For the case of abrupt drift, we first bound the recovery time for DriftSurf through Lemmas 9 and 11, and then establish risk-competitiveness after recovery in Theorem 1.

Consider the case where drift happens during a stable state. In this case, we could bound the number of times DriftSurf enters reactive state:

**Lemma 9.** *With probability  $1 - \epsilon_1$ , for any value of  $k > 0$ , the number of times DriftSurf enters the reactive state before recovering from a drift is less than  $\frac{k+1}{q_d}$  where  $\frac{1}{\epsilon_1} \leq 1 + \frac{k^2}{1-q_d}$ .*

*Proof.* Let  $X$  be a random variable denoting the number of times DriftSurf enters the reactive state after a drift and before recovering from it. Using Cantelli's inequality for any real number  $\lambda > 0$ , we have:

$$\Pr[X - \mu \geq \lambda] \leq \frac{\sigma^2}{\sigma^2 + \lambda^2}$$

where  $\mu = \mathbb{E}[X] = \frac{1}{q_d}$  and  $\sigma^2 = \text{Var}[X] = \frac{1-q_d}{q_d^2}$ . Let  $\lambda = \frac{k}{q_d}$ , therefore,

$$\Pr[X \geq \frac{(k+1)}{q_d}] \leq \frac{1}{1 + \frac{k^2}{1-q_d}} \leq \epsilon_1$$

□

Using Lemma 9, we can provide a high probability guarantee on the number of times DriftSurf enters a reactive state before recovering from a drift. Given that the length of a reactive state is at most  $r$ , we will have a high probability guarantee on the total time DriftSurf spends in reactive states before it recovers. In addition to that, we need to investigate the total amount of time DriftSurf will spend in stable states. Lemma 10 addresses this problem.

**Lemma 10.** *Let  $Y = \sum_{i=1}^{k'} Y_i$ , where  $k' \geq 1$  and  $Y_i$  for  $i = 1, \dots, k'$ , are independent geometric random variables distributed  $Y_i \sim \text{Ge}(p_d)$  and  $\mathbb{E}[Y] = \frac{k'}{p_d}$ . For any  $\lambda \geq 1$ , we have:*

$$\Pr\left[X \geq \frac{\lambda k'}{p_d}\right] \leq e^{-k'(\frac{\lambda}{2} - \ln 2)}$$

*Proof.* Similar to the proof of Theorem 2.1 in (Janson, 2018) and by setting parameter  $t$  (defined in their proof) to  $\frac{p_d}{2}$ . □

Now, by putting together the results of Lemma 9 and lemma:GeometricBound, we can now provide a probabilistic upper bound on the recovery time as follows:

**Lemma 11.** *With probability  $1 - \epsilon_r$ , the recovery time of DriftSurf after a drift that happened during the stable state, is bounded by  $W$ , where  $\epsilon_r = \epsilon_1 + \epsilon_2$ ,  $\frac{1}{\epsilon_1} \leq 1 + \frac{(Wq_d - 1)^2}{1 - q_d}$ ,  $\epsilon_2 \geq e^{-\frac{W}{rg}}$ , and  $g = \frac{4 \ln 2}{p_d r} + 1$ .*

*Proof.* The number of time steps in recovery time can be divided into two disjoint set of time steps: i) time steps spent in reactive state, and ii) time steps spent in stable state. Using Lemma 9, we can bound the number of times  $X$  that DriftSurf enters reactive state before recovering from a drift. Therefore, w.p. at least  $1 - \epsilon_1$ , for any value of  $k > 0$ , we have  $X < \frac{k+1}{q_d}$ , where  $\frac{1}{\epsilon_1} \leq 1 + \frac{k^2}{1-q_d}$ . Therefore, for the proper choice of  $\epsilon_1$ , total number of time steps spent in the reactive state is bounded by  $r \times X < \frac{(k+1)r}{q_d}$ . Note that early exiting the reactive state leads to spent less than  $r$  time steps in a reactive state, and therefore, does not change this upper bound.

On the other hand, we have Lemma 10, which bounds the number of time steps spent in the stable state. Let  $Y = \sum_{i=1}^{k'} Y_i$ , where  $k' \geq 1$  and  $Y_i$  for  $i = 1, \dots, k'$ , are independent geometric random variables with distributions:  $Y_i \sim \text{Ge}(p)$ . In fact, each  $Y_i$  denotes the number of time steps DriftSurf spent in stable state between  $i-1$ th and  $i$ -th times it enters reactive state before recovering from the drift. Using Lemma 10 we have:

$$\Pr\left[Y \geq \frac{k' \lambda}{p_d}\right] \leq e^{-k'(\frac{\lambda}{2} - \ln 2)}$$

Therefore, with probability  $1 - \epsilon_2$ , for any value  $k' \geq 1$  we have  $Y < \frac{k' \lambda}{p_d}$ , where  $\epsilon_2 \geq e^{-k'(\frac{\lambda}{2} - \ln 2)}$ . Note that  $k'$  is the same as  $X$  which we bounded in before by  $\frac{(k+1)}{q_d}$ . Consequently, for the choice of  $k = \frac{Wq_d}{rg} - 1$  and  $\lambda = rg(p_d(g-1)) = 4 \ln 2$ , where  $g = \frac{4 \ln 2}{p_d r} + 1$ , w.p. at least  $1 - \epsilon$ , we have the recovery time is bounded by  $W$ , where  $\epsilon = \epsilon_1 + \epsilon_2$ , with the corresponding conditions on  $\epsilon_1$  and  $\epsilon_2$ .

□

So far we have discussed the case where drift happens during the stable state. For the case that drift happens within the reactive state, then by the early-exit condition, the drift is likely to be detected upon returning to the stable state and then later re-entering the reactive state with the same probability bound  $p_d$ , and switching the model with the same probability bound  $q_d$ . We make this precise in the following, and bound the recovery time for either case of drift in Lemma 14.

On the other hand, we have:

**Lemma 12.** *If a drift happens during the stable state and DriftSurf enters the reactive state, then w.p. at most  $1 - p_d^r$  it will exit the reactive state early.*

*Proof.*

$$\begin{aligned} \Pr[\text{early exiting}] &= \Pr\left[\bigcup_{i=1}^{i=r} \text{early exit after } i \text{ time steps}\right] = \sum_{i=1}^{i=r} \Pr[\text{early exit after } i \text{ time steps}] \\ &\geq \sum_{i=1}^r (1 - p_d) p_d^{i-1} = (1 - p_d) \left(\frac{p_d^r - 1}{p_d - 1}\right) = 1 - p_d^r \end{aligned}$$

□

**Lemma 13.** *If DriftSurf enters reactive state due to a false positive, and then a drift happens after  $j$  time steps in the reactive state, then w.p. at least  $1 - p_s^j p_d^{r-j}$  DriftSurf exits the reactive state early.*

*Proof.*

$$\begin{aligned} \Pr[\text{early exiting}] &= \Pr\left[\bigcup_{i=1}^{i=r} \text{early exit after } i \text{ time steps}\right] = \sum_{i=1}^{i=r} \Pr[\text{early exit after } i \text{ time steps}] \\ &\geq \sum_{i=1}^{j-1} (1 - p_s) p_s^{i-1} + \sum_{i=1}^{r-j} p_s^j (1 - p_d) p_d^{i-1} \\ &= (1 - p_s^j) + p_s^j (1 - p_d^{r-j}) = 1 - p_s^j p_d^{r-j} \end{aligned}$$

□

Using Lemma 13, and denoting the probability of not exiting the reactive state by  $\epsilon_3$ , we can generalize Lemma 11 as follows:

**Lemma 14.** *With probability  $1 - \epsilon'_r$ , the recovery time of DriftSurf, from a drift that occurs while either in the stable state or in the reactive state, is bounded by  $W$ , where  $\epsilon'_r = \epsilon_1 + \epsilon_2 + \epsilon_3$ ,  $\frac{1}{\epsilon_1} \leq 1 + \frac{(W q_d - 1)^2}{1 - q_d}$ ,  $\epsilon_2 \geq e^{-\frac{W}{rg}}$ ,  $g = \frac{4 \ln 2}{p_d r} + 1$ , and  $\epsilon_3 \leq p_d$ .*

One more fact we will use before we prove Theorem 1 on risk-competitiveness is the the following Lemma from (Daneshmand et al., 2016), which is a consequence of the generalization bound in Equation 1.

**Lemma 15.** (THEOREM 3 IN (DANESHMAND ET AL., 2016)) *If  $\mathbb{E}[\text{SUBOPT}_{\mathcal{T}}(\mathbf{w})] \leq \epsilon$ , then  $\mathbb{E}[\text{SUBOPT}_{\mathcal{S}}(\mathbf{w})] \leq \epsilon + \frac{n-m}{n} \mathcal{H}(m)$  where  $\mathcal{T} \subset \mathcal{S}$ ,  $|\mathcal{T}| = m$ ,  $|\mathcal{S}| = n$ , and  $\mathcal{T}$  and  $\mathcal{S} - \mathcal{T}$  are drawn from the same distribution.*

With the preceding lemmas, we can now establish the risk-competitiveness of DriftSurf in the stationary period between abrupt drifts at times  $t_{d_i}$  and  $t_{d_{i+1}}$ . Note that if two drifts occur rapidly in succession, the condition in Lemma 1 of  $t_{d_i} + l < t < t_{d_{i+1}}$  may correspond to an empty domain if the recovery time bound of DriftSurf exceeds the gap between the drifts.

**Theorem 1.** *With probability  $1 - \epsilon$ , the predictive model of DriftSurf in the stable state is  $\frac{7}{4^{1-\alpha}}$ -risk-competitive with Aware at any time step  $t_{d_i} + 3W + c_4/(\epsilon_s - c_3) \leq t < t_{d_{i+1}}$ , where  $t_{d_i}$  is the time step of the most recent drift and  $\epsilon = \epsilon_s + \epsilon_r$  where  $\epsilon_r$  is bounded by Lemma 11 (and where  $c_3$  and  $c_4$  are the same constants in Corollary 1).*



*Proof.* By Lemma 11, with probability  $1 - \epsilon_r$ , DriftSurf recovers from drift after  $W$  time steps. After recovering from the drift, DriftSurf is in a recovered state. Let  $t_r$  be the time step that DriftSurf recovers from the most recent drift at time  $t_d = t_{d_i}$ . Also, let  $t_e$  be the time step that the current predictive model was initialized.

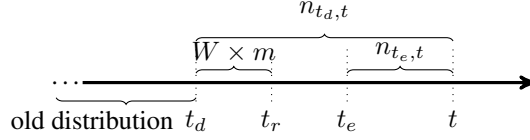

Figure 5: A drift happens at time  $t_d$ . DriftSurf recovers by time  $t_r$ . The current predictive model is initialized at time  $t_e$ .

To show DriftSurf is  $\frac{7}{4^{1-\alpha}}$ -risk-competitive to Aware, we want to show  $n_{t_e,t} \geq \frac{n_{t_d,t}}{4}$ . Using Corollary 3, w.p.  $1 - \epsilon_s$  we have  $n_{t_e,t} \geq \frac{n_{t_r,t}}{2}$  at any time step  $t$  such that  $t_r + 2W + c_4/(\epsilon_s - c_3) \leq t < t_{d_{i+1}}$ . Therefore,  $n_{t_e,t} \geq n_{t_r,t_e}$ . On the other hand, we have

$$\begin{aligned} n_{t_e,t} &= n_{t_d,t} - n_{t_d,t_r} - n_{t_r,t_e} \\ &= n_{t_d,t} - W \times m - n_{t_r,t_e} \geq n_{t_d,t} - W \times m - n_{t_e,t}. \end{aligned}$$

Also, at any time step  $t$  such that  $t - t_d \geq 3W + c_4/(\epsilon_s - c_3) \leq t < t_{d_{i+1}}$ , we have  $t - t_d \geq 2W$ . Therefore,

$$2n_{t_e,t} \geq n_{t_d,t} - W \times m \geq \frac{n_{t_d,t}}{2}.$$

It remains to bound the expected sub-optimality over  $\mathcal{S}_{t_d,t}$ . Assumption 1 bounds the expected sub-optimality over  $\mathcal{S}_{t_e,t}$  as  $(1 + o(1))\mathcal{H}(n_{t_e,t})$ , and Lemma 15 relates the expected sub-optimality over  $\mathcal{S}_{t_e,t}$  to the expected sub-optimality over  $\mathcal{S}_{t_d,t}$ :

$$\begin{aligned} \mathbb{E}[\text{SUBOPT}_{\mathcal{S}_{t_d,t}}(\text{DriftSurf})] &\leq \mathcal{H}\left(\frac{n_{t_d,t}}{4}\right) + \frac{n_{t_d,t} - n_{t_e,t}/4}{n_{t_d,t}} \mathcal{H}\left(\frac{n_{t_d,t}}{4}\right) \\ &\leq \frac{7}{4^{1-\alpha}} \mathcal{H}(n_{t_d,t}). \end{aligned} \quad \square$$

Similar results can be proved for the case where drift happens during a reactive state. The only difference would be that  $\epsilon_r$  will be replaced by  $\epsilon'_r$ , which is defined in Lemma 14.

## C. Additional Details on the Experimental Setup

This section contains additional details on the algorithms, datasets, and training for the experimental evaluation.

### C.1. Algorithms Evaluated

In our experimental evaluation, we compare our algorithm DriftSurf to MDDM (Pesaranghader et al., 2018) and AUE (Brzezinski & Stefanowski, 2013), as representatives of state-of-the-art drift-detection-based and ensemble-based algorithms, respectively. The MDDM algorithm maintains a sliding window over the prediction results, which is a binary series indicating for each data point whether the model’s predicted label matches the true label. MDDM signals a drift whenever a weighted mean over the sliding window is worse than the best observed weighted mean so far by a specified threshold. Upon signaling a drift, the current model is discarded and a new model is initialized starting at the current time step. Pesaranghader et al. offer three variants of their algorithm, MDDM-A, MDDM-G, and MDDM-E, differing in the weighting scheme applied over the sliding window. Pesaranghader et al. remark that “all three variants had comparable levels of accuracy” across each dataset they tested and that “the optimal shape for the weighting function is data, context and application dependent” (Pesaranghader et al., 2018). Generally, we do not know the type of drifts that will occur in advance, and so in our experiments, we used the intermediate choice MDDM-G, corresponding to a geometric weighting. (We also perform a sensitivity study among all three variants.) We reused the source code for MDDM-G available in the Tornado framework from Pesaranghader et al., and we used their default parameters for their algorithm: the window size  $n = 100$ , the confidence level  $\delta_w = 10^{-6}$ , and the geometric weighting factor  $r = 1.01$ .



The AUE algorithm (sometimes called AUE2 to distinguish from a preliminary published version of the algorithm) manages an ensemble of  $k$  experts that are incrementally trained over the stream. After each batch of arrivals, AUE updates the weight of each expert based on its prediction error, and drops the lowest weighted expert to introduce a new expert. The prediction output from the ensemble is a weighted vote by its experts. We used the parameter  $k = 10$  as the limit on the total number of experts, following the choice made by Brzezinski and Stefanowski in their experimental evaluation (Brzezinski & Stefanowski, 2013).

Another ensemble algorithm we compare against is the Paired Learners (PL) algorithm (Bach & Maloof, 2008). In PL, two models are maintained at a time, a long-lived model that is best-suited in the stationary case, and a new model trained over a recent sliding window of size  $w$  that is best-suited in the case of a drift. The new model is switched to based on a test as a function of the recent performance of the two models and a threshold  $\theta$ . In adapting the original point-wise algorithm to the batched setting in our experiments, we set  $w$  to the batch size instead of being a tunable parameter. For the value of  $\theta$ , the original paper does not suggest a default choice, so we used  $\theta = 0.2$ , which led to the lowest observed misclassification rate averaged across all datasets when choosing from the range  $[0.05, 0.5]$  in increments of 0.05.

For the implementation of our algorithm DriftSurf, we used the following parameters. The length of the reactive state  $r = 4$ . Regarding the conditions to enter the reactive state described in §4, the threshold for condition 2 is  $\delta = 0.1$ , and the threshold for condition 3 is  $\delta' = \delta/2$ . The window size  $W = 50$ . In the experimental evaluation, we use an empirically better performing substitute for the corner case condition than the early exit process described in the pseudocode—instead of exiting the reactive state early when there is no observed performance degradation, the implementation uses lack of degradation followed by degradation as a sign of potential drift to skip the stable state and immediately re-enter the reactive state.

In our main experiment, on each dataset discussed below, we evaluate DriftSurf, MDDM (the MDDM-G variant), StandardDD, AUE, and the Aware algorithm with oracle access to when drifts occur (discussed in §5). We also run additional experiments for MDDM-A, MDDM-E, PL, single-pass SGD, and an oblivious algorithm, which maintains a single model updated with STRSAGA. The version of STRSAGA in the oblivious algorithm samples uniformly from its sample set at each iteration and has no bias towards sampling more recent data arrivals.

When using STRSAGA or any other SGD-style optimization, we consider a parameter  $\rho$  that dictates the number of update steps (specifically, gradient computations) that are available to train the model. The different adaptive learning algorithms maintain a different number of models—DriftSurf uses between 1 and 2; Aware, MDDM, and StandardDD use 1; AUE uses 10; and PL uses 2. This leads us to consider two different possibilities for training at each time: (1) each algorithm can use  $\rho$  steps per model; or (2) each algorithm has  $\rho$  steps in total that are divided equally across its models. The second approach accounts for the varying computational efficiency of each algorithm and lets us examine the accuracy achieved when enforcing equal processing time.

For our evaluation under equal processing time, we also evaluate another ensemble method, Condor (Zhao et al., 2020). Condor is a more computationally efficient ensemble method than AUE because it only trains one newly added expert at a time. Condor manages a total of  $K$  experts, for which weights are updated based on observed losses with exponential decay factor  $\eta$ , and the prediction output is a weighted vote. After each epoch of Condor, a new model is added (deleting the oldest if the total exceeds  $K$ ) to minimize the loss over the previous epoch plus an added biased regularization term  $\frac{\mu}{2} \|\mathbf{w} - \mathbf{w}_p\|^2$ , where  $\mathbf{w}_p$  is the weighted linear combination of the ensemble’s experts. In adapting the original point-wise Condor algorithm to our batch setting, we redefine an epoch to be the batch size of the stream for consistent comparison. We set  $K = 25$ ,  $\eta = 0.75$  following the choice made by the authors in their experimental evaluation. Finally, we set  $\mu$  to be the same regularization constant per dataset we use for L2-regularization in training the models of the other evaluated algorithms.

## C.2. Datasets

Our experiments use the 5 synthetic, 2 semi-synthetic and 3 real-world datasets shown in Table 5 and described below. The selection of datasets included all datasets for binary classification used in the experimental evaluations by Pesaranghader et al. on their MDDM algorithm (namely, SINE1 and Electricity) and Brzezinski and Stefanowski on their AUE algorithm (SEA10, Hyperplane-Slow, Hyperplane-Fast, Electricity, and Airlines).

- SEA (Bifet et al., 2010): This dataset is generated using the Massive Online Analysis (MOA) framework. There are three attributes in  $[0, 10]$ . The label is determined by  $x_1 + x_2 \leq \theta_j$  where  $j$  corresponds to 4 different concepts,

Table 5: Basic statistics of datasets

|                | DATASET     | # INSTANCE | # DIM |
|----------------|-------------|------------|-------|
| SYNTHETIC      | SEA         | 100000     | 3     |
|                | HYPERPLANE  | 100000     | 10    |
|                | SINE1       | 10000      | 2     |
|                | MIXED       | 100000     | 4     |
|                | CIRCLES     | 10000      | 2     |
| SEMI-SYNTHETIC | RCV1        | 20242      | 47235 |
|                | COVERTYPE   | 581012     | 54    |
|                | AIRLINE     | 5810462    | 13    |
| REAL           | ELECTRICITY | 45312      | 13    |
|                | POWERSUPPLY | 29928      | 2     |

$\theta_1 = 9, \theta_2 = 8, \theta_3 = 7, \theta_4 = 9.5$  (the third attribute  $x_3$  is not correlated with the label). We synthetically generated 25000 points from each concept in the order 3, 2, 4, 1, following the example from the MOA manual. We experimented on four different datasets varying the amount of noise, SEA0, SEA10, SEA20, SEA30, corresponding to 0%, 10%, 20%, and 30% of the labels being swapped during the generation of the dataset. SEA-gradual is generated by generating samples from two concepts (the first two concepts discussed above) during the drift period.

- Hyperplane (Bifet et al., 2010): This dataset is generated using the MOA framework. For each data point, the label corresponds to its half space for an underlying hyperplane, where each coordinate of the hyperplane changes by some magnitude for each point in the stream, representing a continually gradually drifting concept. We experimented on two variations, Hyperplane-Slow and Hyperplane-Fast, corresponding to a 0.001 and a 0.1 magnitude of change. In each case, at each point in the stream, there is a 10% probability that the direction of the change is reversed.
- SINE1 (Pesaranghader et al., 2016): This dataset contains two attributes  $(x_1, x_2)$ , uniformly distributed in  $[0, 1]$ . Label of each data is determined using a sine curve as follows:  $x_2 \leq \sin(x_1)$ . Labels are reversed at drift points.
- Mixed (Pesaranghader et al., 2016): This dataset contains four attributes  $(x_1, x_2, x_3, x_4)$ , where  $x_1$  and  $x_2$  are boolean and  $x_3, x_4$  are uniformly distributed in  $[0, 1]$ . Label of each data is determined to be positive if two of  $x_1, x_2$ , and  $x_4 < 0.5 + 0.3 \times \sin(3\pi x_3)$  hold. Labels are reversed at drift points.
- Circles (Pesaranghader et al., 2016): This dataset contains two attributes  $(x_1, x_2)$ , uniformly distributed in  $[0, 1]$ . Label of each data is determined using a circle as the decision boundary as follows:  $(x_1 - c_1)^2 + (x_2 - c_2)^2 \leq r$ , where  $(c_1, c_2)$  and  $r$  are (respectively) center and radius of the circle. Drift happens in a gradual manner where the center and radius of decision boundary changes over a period of time. We experimented on a generated dataset with 3 gradual drift introduced at time 25, 50, and 75, where the transition period for each drift is 5 time steps.
- RCV1 (Lewis et al., 2004): This real world data set contains manually categorized newswire stories. The original order of the data set we used was randomly permuted before inserting drift. At drift points, we introduce a sharp abrupt drift by swapping each label. For the experiments on the high-dimensional RCV1 when using the Hoeffding Tree and Naive Bayes base learners, we add a pre-processing step to the dataset to select only 100 features, as determined by the coordinates with the highest magnitude when fitting a logistic regression model to the dataset before drift was added.
- Covertypes (Dua & Graff, 2017): This real world data set contains observation of a forest area obtained from US Forest Service (USFS) Region 2 Resource Information System (RIS). Binary class labels are involved to represent the corresponding forest cover type. The original order of the data set we used was randomly permuted before inserting drift. At drift points, we introduce an abrupt drift by rotating each data point by  $180^\circ$  along the 1st and 8th attributes. This particular rotation was chosen because it resulted in approximately 40% misclassification rate with respect to the current predictive model.
- Airline(2008) (Ikononovska): This real world data set contains records of flight schedules. Binary class labels are involved to represent if a flight is delayed or not. Concept drift could appear as the result of changes in the flights schedules, e.g. changes in day, time, and the length of flights. In our experiments, we used the first 58100 points of the data set, and pre-processed the data by using one-hot encoding for categorical features and scaling numerical features

to be in the range  $[0, 1]$ . The original dataset contains 13 features. But, after using one-hot encoding the dimension increases to 679.

- Electricity (Harries, 1999): This real world data set contains records of the New South Wales Electricity Market in Australia. Binary class labels are involved to represent the change of the price (i.e., up and down). The concept drift may result from changes in consumption habits or unexpected events.
- Power Supply (Dau et al., 2019): This real world data set contains records of hourly power supply of an Italy electricity company which records the power from two sources: power supply from main grid and power transformed from other grids. Binary class labels are involved to represent which time of day the current power supply belongs to (i.e. am or pm). The concept drifting in this stream may results from the change in season, weather or the differences between working days and weekend.

The type of drift in each dataset is detailed in Table 6. When working with real datasets, precisely determining the time drift occurs is somewhat guesswork. Brzezinski and Stefanowski remarked they “cannot unequivocally state when drifts occur or if there is any drift” on the real datasets they considered (Brzezinski & Stefanowski, 2013). Still, we had to mark the drift times for the implementation of Aware, which resets the model whenever drifts occur. We chose these times by observing the misclassification rates of an oblivious algorithm that is not designed to adapt to drift, and noting for which time steps there was a significant increase in misclassifications on the newly arrived batch.

Table 6: Details of drifts in datasets

|                | DATASET     | DRIFT TYPE | DRIFT TIMES           |
|----------------|-------------|------------|-----------------------|
| SYNTHETIC      | SEA         | ABRUPT     | [25, 50, 75]          |
|                |             | GRADUAL    | [40-60]               |
|                | HYPERPLANE  | GRADUAL    | -                     |
|                | SINE1       | ABRUPT     | [20, 40, 60, 80]      |
|                | MIXED       | ABRUPT     | [20, 40, 60, 80]      |
| SEMI-SYNTHETIC | CIRCLES     | GRADUAL    | [25-30, 50-55, 75-80] |
|                | RCV1        | ABRUPT     | [30, 60]              |
|                | COVERTYPE   | ABRUPT     | [30, 60]              |
| REAL           | AIRLINE     | -          | [31, 67]              |
|                | ELECTRICITY | -          | [20]                  |
|                | POWERSUPPLY | -          | [17, 47, 76]          |

### C.3. Training and Hyperparameters

On each dataset, the prediction task is binary classification. Each model  $\mathbf{w}$  trained is a linear model, using STRSAGA to optimize the L2-regularized logistic loss over the relevant stream segment. For a data point  $(x, y)$ , the corresponding loss function is  $f_{(x,y)}(\mathbf{w}) = \log(1 + \exp(-y\mathbf{w}^T x)) + \frac{\mu}{2} \|\mathbf{w}\|_2^2$ .

There are two hyperparameters used by STRSAGA, the regularization factor  $\mu$  and the constant step size  $\eta$ . To set them, we first took each dataset in static form (opposed to streaming) and applied a random permutation, partitioning an 80% split for training and 20% for validation. (For the case of the semi-synthetic datasets where we introduced our own drift, the hyperparameter selection was done prior to modifying the data.) We used grid search to determine the values of  $\mu$  and  $\eta$  that optimized the validation set error after running STRSAGA over the static training set for a number of iterations equal to two times the number of data points. We searched for  $\mu$  of the form  $10^{-a}$  for  $1 \leq a \leq 7$  and  $\eta$  of the form  $b \times 10^{-c}$  for  $b \in \{1, 2, 5\}$  and  $1 \leq c \leq 5$ . The parameters we chose are given in Table 7. In experiments where we used SGD for training, we used the same constant step size  $\eta$ .

We also run experiments using Hoeffding Trees (HT) and Naive Bayes (NB) as base learners. We use the implementation of HT and NB available in the scikit-multiflow package (Montiel et al., 2018), using their default hyperparameters (namely for HT, the grace period is 200, the split criterion uses information gain, the split confidence is  $10^{-7}$ , and the tie-threshold is 0.05). In these experiments, we use the following hyperparameters for DriftSurf:  $r = 6$ ,  $\delta = 0.05$ ,  $\delta' = \delta/10$ ,  $W = 50$ .

In the streaming data setting studied in this paper (§3), the batch size is determined by the rate of arrival of new data points, and hence not a hyperparameter to be tuned. For simplicity, we assume that data arrive over the course of  $b$  time steps in

Table 7: Hyperparameters and batch sizes

| DATASET     | REGULARIZATION $\mu$ | STEP SIZE $\eta$   | BATCH SIZE $m$ |
|-------------|----------------------|--------------------|----------------|
| SEA (ALL)   | $10^{-2}$            | $1 \times 10^{-3}$ | 1000           |
| HYPER-SLOW  | $10^{-3}$            | $1 \times 10^{-1}$ | 1000           |
| HYPER-FAST  | $10^{-3}$            | $1 \times 10^{-2}$ | 1000           |
| SINE1       | $10^{-3}$            | $2 \times 10^{-1}$ | 100            |
| MIXED       | $10^{-3}$            | $1 \times 10^{-1}$ | 1000           |
| CIRCLES     | $10^{-3}$            | $1 \times 10^{-1}$ | 100            |
| RCV1        | $10^{-5}$            | $5 \times 10^{-1}$ | 202            |
| COVERTYPE   | $10^{-4}$            | $5 \times 10^{-3}$ | 5810           |
| AIRLINE     | $10^{-3}$            | $2 \times 10^{-2}$ | 581            |
| ELECTRICITY | $10^{-4}$            | $1 \times 10^{-1}$ | 1333           |
| POWERSUPPLY | $10^{-3}$            | $1 \times 10^{-1}$ | 299            |

equally-sized batches containing  $m = (\text{dataset size})/b$  points, where  $b = 100$  for all datasets other than Electricity. For the case of Electricity, we defined the number of time steps  $b = 34$  so that one time step corresponds to 28 days of the collected data, and was a scale where we could visually observe drift in the results. The resulting batch sizes are shown in the last column of Table 7.

## D. Additional Experimental Results

This section contains experimental results under both training strategies of equal computational power for each model and equal computational power for each algorithm, which is divided among its models. Additionally, we report results for a sensitivity analysis of the threshold in DriftSurf, results for DriftSurf without the greedy approach during the reactive state, results for single-pass SGD and an oblivious algorithm using STRSAGA, results for each algorithm when SGD is used as the update process instead of STRSAGA, results when using Hoeffding Trees and Naive Bayes classifiers as the base learners, and results of each algorithm under a 95%-recovery-time metric.

### D.1. Equal Computational Power for Each Model

First, we compare each algorithm under the setting where at every time step, each algorithm uses  $\rho = 2m$  update steps (gradient computations) to update each of its models. In this case, the total computational power used varies per algorithm. For example, at each time step AUE maintains an ensemble of ten models, while MDDM maintains just one (and DriftSurf maintains either one or two), so AUE uses ten times the total computation of MDDM. (Later in §D.2, we will study a different setting where the available computational power for each algorithm is divided equally among all of its models, in order to account for the varying computational efficiency of each algorithm.)

We present the misclassification rates at each time step over the new batch in Figure 6, and the average misclassification rate over all time steps is summarized in Table 8. (These results are a superset of those presented in Figure 1 and Table 2 from §6). The advantage of DriftSurf over MDDM is most evident on the noisy versions of SEA (also shown in Figure 7), and on CoverType, Electricity, and PowerSupply. The drift detection method MDDM (and similarly over StandardDD) encounters false positives that lead to unnecessary resetting of the predictive model, while DriftSurf avoids the performance loss after most of the false positives by catching them via the reactive state. In particular, the CoverType dataset was especially problematic for MDDM, which continually signaled a drift.

For sharp drifts when immediately switching to a new model is desirable, we observe, most evident on SINE1, that MDDM is the fastest to adapt, followed shortly by DriftSurf, then PL, with AUE lagging behind. CoverType also is a clear example where DriftSurf and StandardDD adapt faster than AUE (but MDDM suffered as previously mentioned). For these drifts, MDDM and StandardDD naturally lead because they are using a new model when they accurately detect a drift, while DriftSurf always takes at least one time step to switch because it waits until it sees a batch where the new (reactive) model outperforms the older (stable) model. AUE also takes at least one time step, because its ensemble members are weighted based on the previous performance, but it can take longer, because even if the older, inaccurate models are low-weighted, they are not weighted zero, and shortly after a drift, most of the models in the ensemble are trained on old data and can still

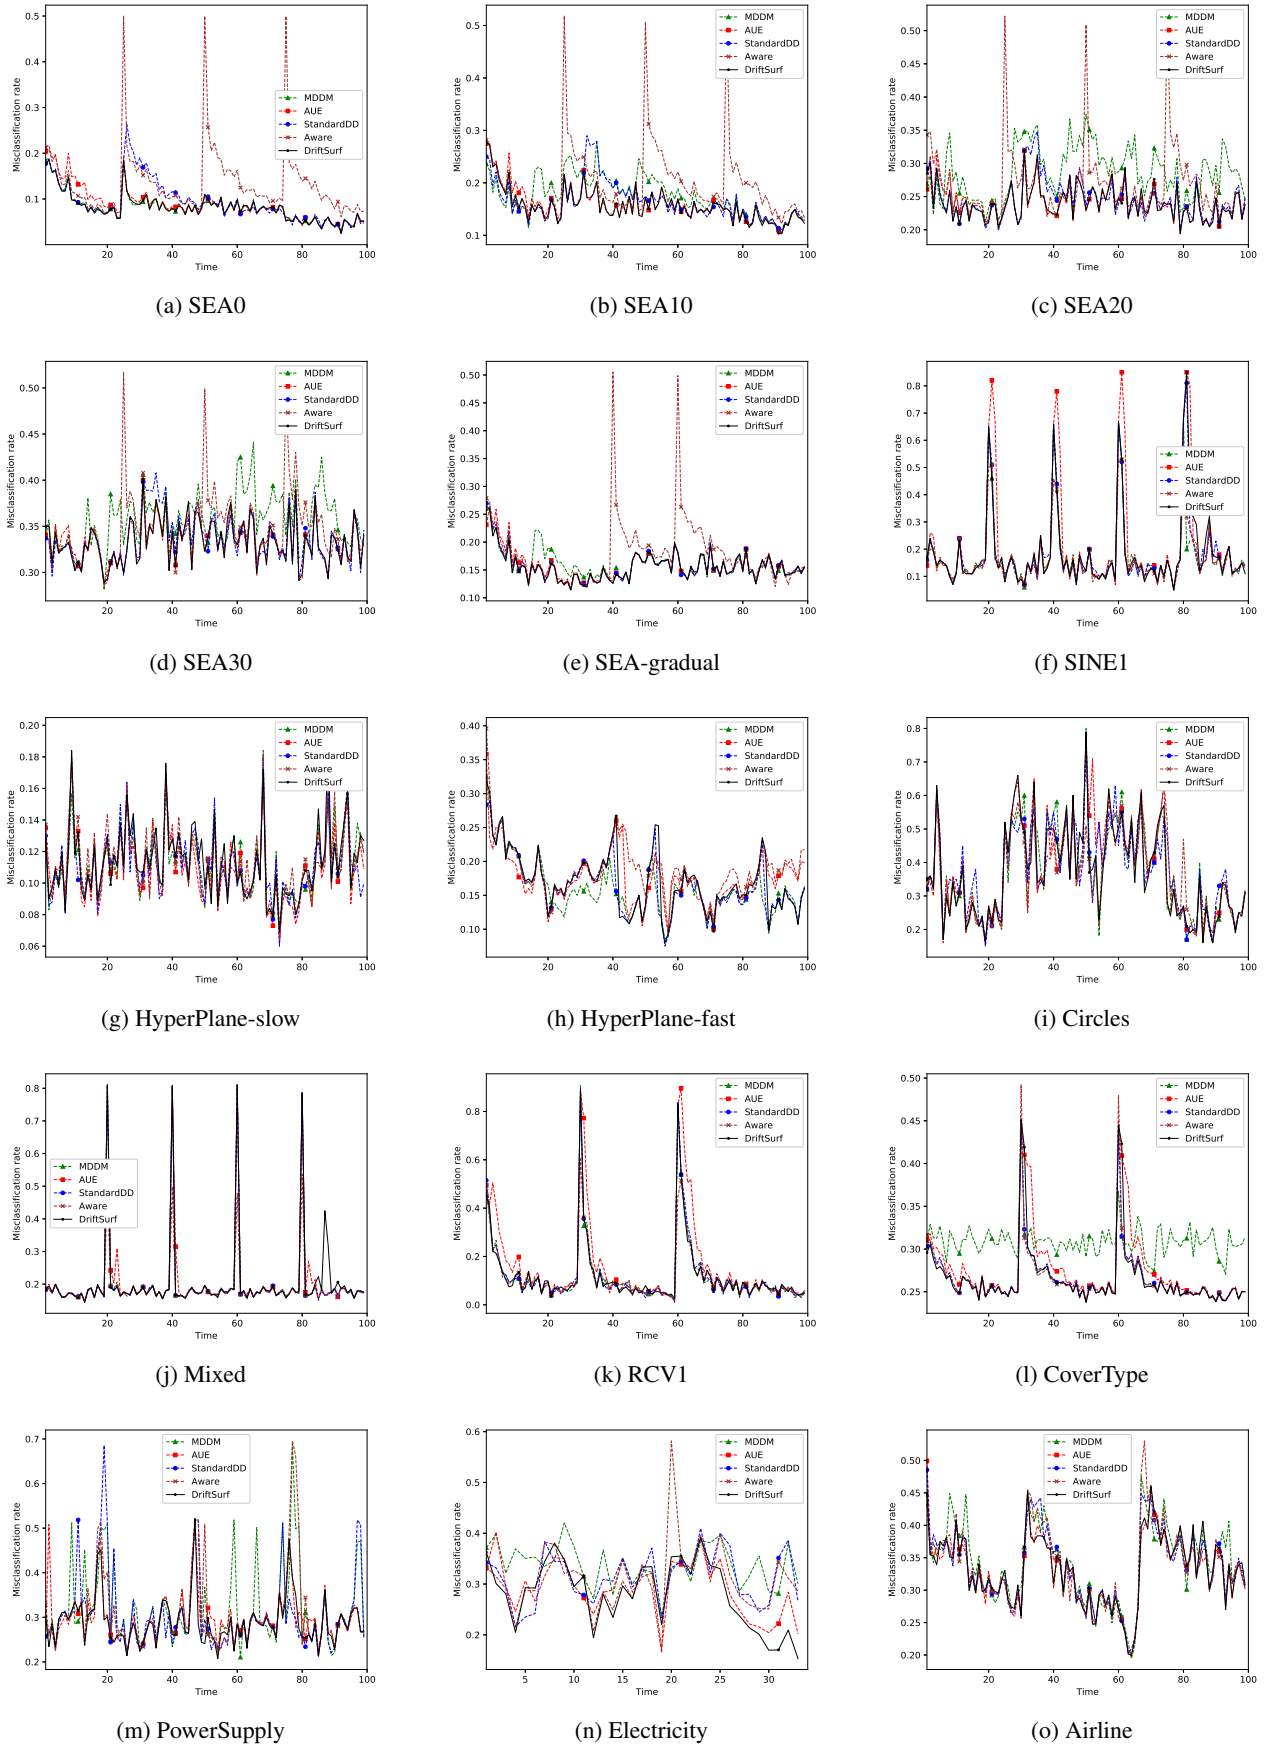

Figure 6: Misclassification rate over time ( $\rho = 2m$  for each model)

Table 8: Total average of misclassification rate ( $\rho = 2m$  for each model)

| DATASET     | Aware | DriftSurf    | StandardDD   | MDDM-G       | MDDM-A       | MDDM-E       | AUE          | PL           | IPASS-SGD | OBL   |
|-------------|-------|--------------|--------------|--------------|--------------|--------------|--------------|--------------|-----------|-------|
| SEA0        | 0.137 | 0.086        | 0.097        | <b>0.086</b> | 0.090        | 0.087        | 0.093        | <b>0.085</b> | 0.131     | 0.110 |
| SEA10       | 0.197 | <b>0.160</b> | 0.168        | 0.180        | 0.166        | 0.172        | 0.163        | 0.161        | 0.188     | 0.176 |
| SEA20       | 0.264 | <b>0.243</b> | 0.249        | 0.289        | 0.278        | 0.289        | 0.245        | <b>0.243</b> | 0.267     | 0.254 |
| SEA30       | 0.350 | <b>0.335</b> | 0.338        | 0.358        | 0.358        | 0.352        | 0.337        | 0.337        | 0.348     | 0.338 |
| SEA-GRADUAL | 0.177 | 0.159        | 0.160        | 0.165        | 0.167        | 0.174        | 0.162        | <b>0.157</b> | 0.196     | 0.173 |
| HYPER-SLOW  | 0.116 | 0.118        | 0.116        | 0.116        | 0.117        | 0.116        | <b>0.112</b> | 0.118        | 0.139     | 0.170 |
| HYPER-FAST  | 0.191 | 0.173        | 0.168        | <b>0.163</b> | <b>0.163</b> | 0.164        | 0.179        | 0.188        | 0.177     | 0.280 |
| SINE1       | 0.171 | 0.187        | 0.184        | 0.176        | <b>0.175</b> | 0.178        | 0.212        | 0.193        | 0.223     | 0.477 |
| MIXED       | 0.192 | 0.204        | 0.204        | 0.204        | 0.204        | <b>0.203</b> | 0.209        | 0.219        | 0.208     | 0.455 |
| CIRCLES     | 0.368 | <b>0.371</b> | 0.377        | 0.372        | 0.375        | 0.372        | 0.379        | 0.373        | 0.385     | 0.508 |
| RCV1        | 0.121 | <b>0.125</b> | 0.126        | <b>0.125</b> | 0.130        | 0.130        | 0.167        | 0.148        | 0.276     | 0.468 |
| COVERTYPE   | 0.267 | 0.268        | <b>0.267</b> | 0.311        | 0.311        | 0.313        | 0.279        | 0.287        | 0.298     | 0.321 |
| AIRLINE     | 0.338 | 0.334        | 0.338        | 0.345        | 0.346        | 0.348        | <b>0.333</b> | <b>0.333</b> | 0.340     | 0.359 |
| ELECTRICITY | 0.315 | <b>0.290</b> | 0.320        | 0.344        | 0.339        | 0.341        | 0.296        | 0.291        | 0.347     | 0.302 |
| POWERSUPPLY | 0.309 | <b>0.292</b> | 0.308        | 0.322        | 0.315        | 0.329        | 0.301        | 0.306        | 0.307     | 0.312 |

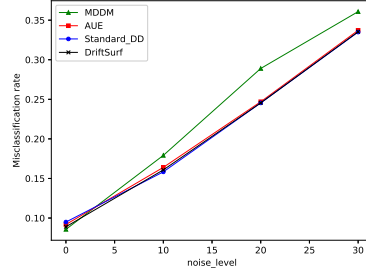

Figure 7: Total average of misclassification rate for SEA dataset with different levels of noise

negatively impact the predictions. On SINE1, we observe that the ensemble of two models, PL, adapts faster than AUE. At every time step, PL trains a new model over the latest batch, similarly to AUE, but differs in that it the latest model is either switched to as the predictive model, or discarded. That is, PL uses exclusively an old or new model, instead of a weighted combination over ten models like in AUE.

There are two major advantages of DriftSurf and AUE not immediately switching to the latest model: (i) there are drifts for which switching to a new model is not desired because the older model can still provide good accuracy, and (ii) delaying the switch to a new model can be desired if the new model has poor accuracy immediately after the drift while it warms up. Regarding the first point, observe the drift in SEA10 at  $t = 25$  and the drift in Electricity. There is a notable degradation in accuracy of each algorithm at the time of the drift, but resetting the model as Aware does is a poor choice. We even observe that the oblivious algorithm (OBL) (which trains a model from the beginning of time and is not designed to adapt to drifts) outperforms Aware on these datasets. Despite the initial degradation in accuracy at the time of drift, we find that the older model is able to converge again after the drift, even while the older model is trained on data from both before and after the drift. Meanwhile, training a new model from scratch as Aware does is not worth the initial start-up cost when the older model performs well.

The reader may be skeptical specifically of Aware’s reset to a random model for predictions at the time step drift occurs—practically, would it be preferable to use the previously-learned model for the first time step, and then switch to the new model? We considered this alternative implementation of Aware, and observed that across each dataset, the average misclassification rate of the alternative Aware was better by at most 1.1 percentage points than the version of Aware reported in Table 8, and was worse on SINE1 and RCV1. There was no case where the alternative Aware outperformed any algorithm in the table that Aware did not already outperform.



The second advantage previously mentioned, of delaying the switch to the new model, is best exemplified on Airline. Immediately after the two drifts, DriftSurf and AUE are the best performers, followed by StandardDD and MDDM, and then Aware. Immediately after the drift, DriftSurf continues to use the older, stable model, which outperforms a newly created model (compare DriftSurf to Aware), because a new model needs a few time steps to train before it is a better choice, and then DriftSurf switches later. AUE is of intermediate error in the time steps immediately after the drift, because it does place greater weight on the better performing, older models, but is still worse than placing unit weight on an old model.

The Hyperplane-slow and Hyperplane-fast datasets warrant their own discussion. These two datasets represent a continually drifting concept throughout the entire stream. For Hyperplane-slow, AUE is the best performing algorithm, while for Hyperplane-fast, MDDM is the best performing. The advantage that AUE and MDDM have over DriftSurf in these datasets is that AUE adds a new model at every time step, and MDDM has the capability of switching to a new model at any time step, and therefore, they can better fit the most recent data in the stream. On the other hand, DriftSurf is only able to create a new model upon transitioning to the reactive state, so DriftSurf does not have the capability of creating new models at time steps during its reactive state. DriftSurf is not designed for the setting where creating a new model at every time step is desirable, but nonetheless, the accuracy of DriftSurf is still comparable. Furthermore, on the remaining datasets with gradual drift, SEA-gradual and Circles, that contain stationary periods and drift periods instead of the continual drift of Hyperplane, DriftSurf is the best performer.

Table 8 includes results for MDDM-G (what we use generally for MDDM), as well as two other MDDM variants, MDDM-A and MDDM-E, for a more thorough comparison. The average misclassification rates were similar across each dataset, with no single MDDM variant that consistently outperformed the others. Given the poor performance of MDDM on CoverType, we re-did the experiment on CoverType with two other drift detection methods, DDM (Gama et al., 2004) and EDDM (Baena-García et al., 2006) to investigate further. In Figure 8, we observed DDM accurately detected the two drifts, but EDDM also suffered with continual false positives.

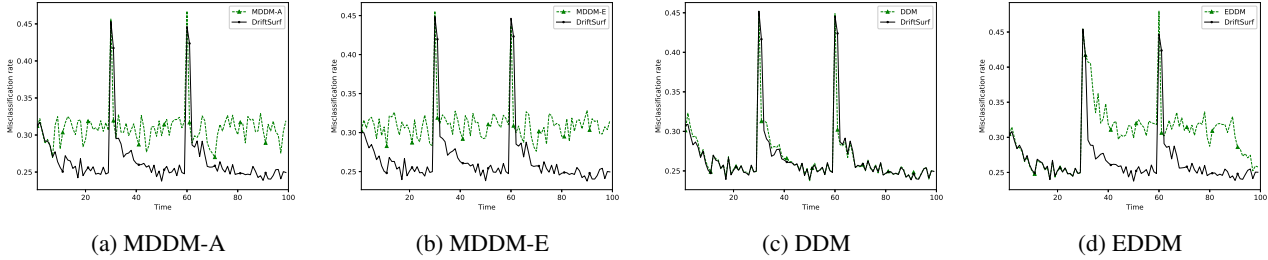

Figure 8: CoverType dataset, comparing different drift detectors ( $\rho = 2m$  for each model)

Table 8 also includes results for PL, the ensemble of 2 models. As noted earlier, by choosing exclusively an old or new model it can adapt faster than AUE on datasets like SINE1 or RCV1. However, PL’s performance is still short of DriftSurf on SINE1, as well as on PowerSupply, because PL may falsely switch to the new model in the absence of drift, while the condition DriftSurf reduces false switches. Furthermore, PL is short of DriftSurf on RCV1 because PL only gives the new model one time step to be switched in before being discarded, requiring multiple tries to switch after the drift.

## D.2. Equal Computational Power for Each Algorithm

Next, we present results for the training strategy where each algorithm has access to  $\rho$  update steps in total that are divided among all its models so that the computation time of each algorithm is identical. For the case  $\rho = 4m$ , the misclassification rate at each time step is shown in Figure 9 for the comparison of DriftSurf, Aware, MDDM, and AUE and in Figure 10 for the additional algorithmic comparisons against two ensemble methods, AUE ( $k = 2$ ) and Condor. The average over time is in Table 9. For the case  $\rho = 2m$ , the misclassification rate at each time is shown in Figure 11, and the average over time is in Table 10.

Let us discuss a few differences from the previous case where each model was trained with  $\rho$  steps. We generally observe lower relative accuracy for AUE, and especially so after drifts. (The exceptions are on Circles and PowerSupply, where the extra training iterations do not matter as much; compare to the fast convergence of Aware after a reset.) This is because AUE is an ensemble of 10 models, and so each model is trained at most 1/5 of the steps that the models of DriftSurf get, and



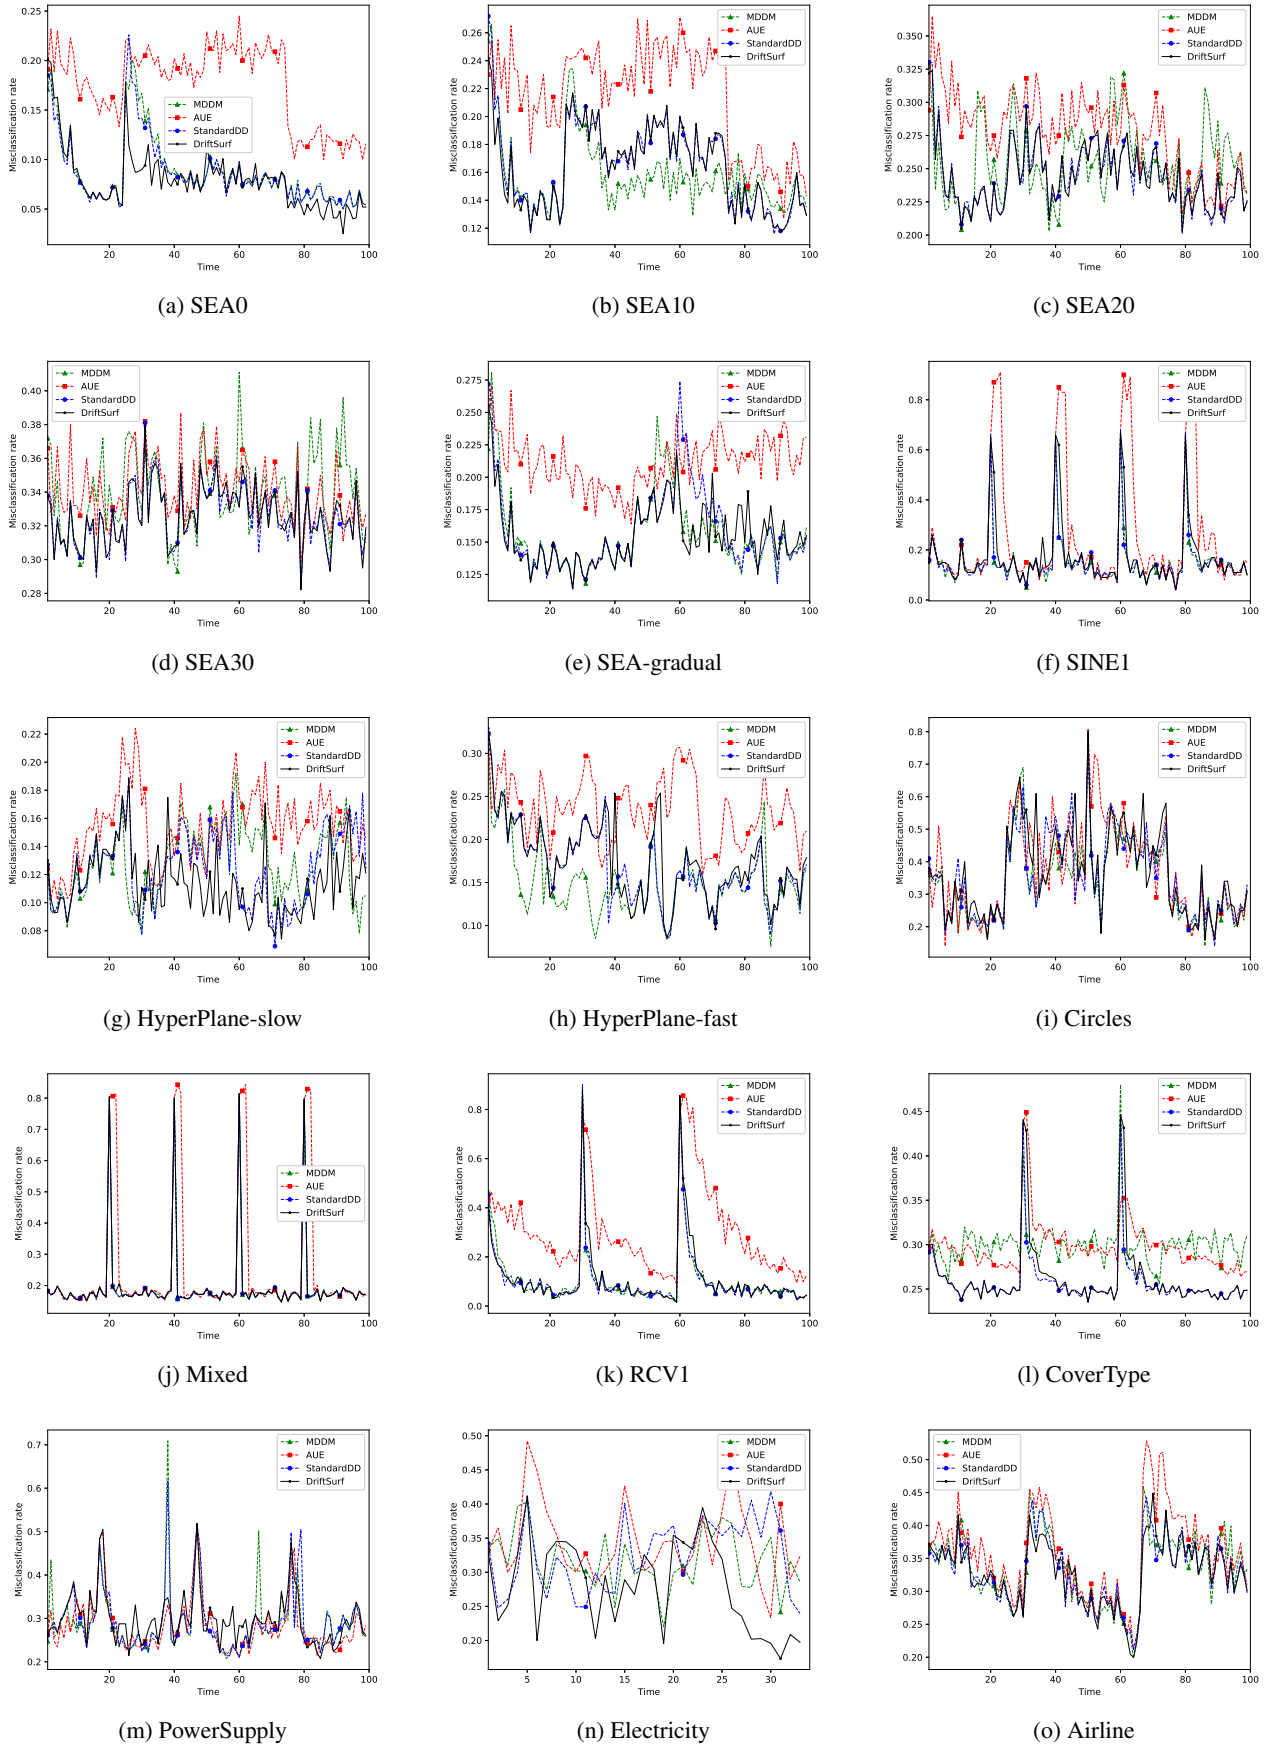

Figure 9: Misclassification rate over time ( $\rho = 4m$  divided among all models of each algorithm) comparing Aware, DriftSurf, AUE and MDDM

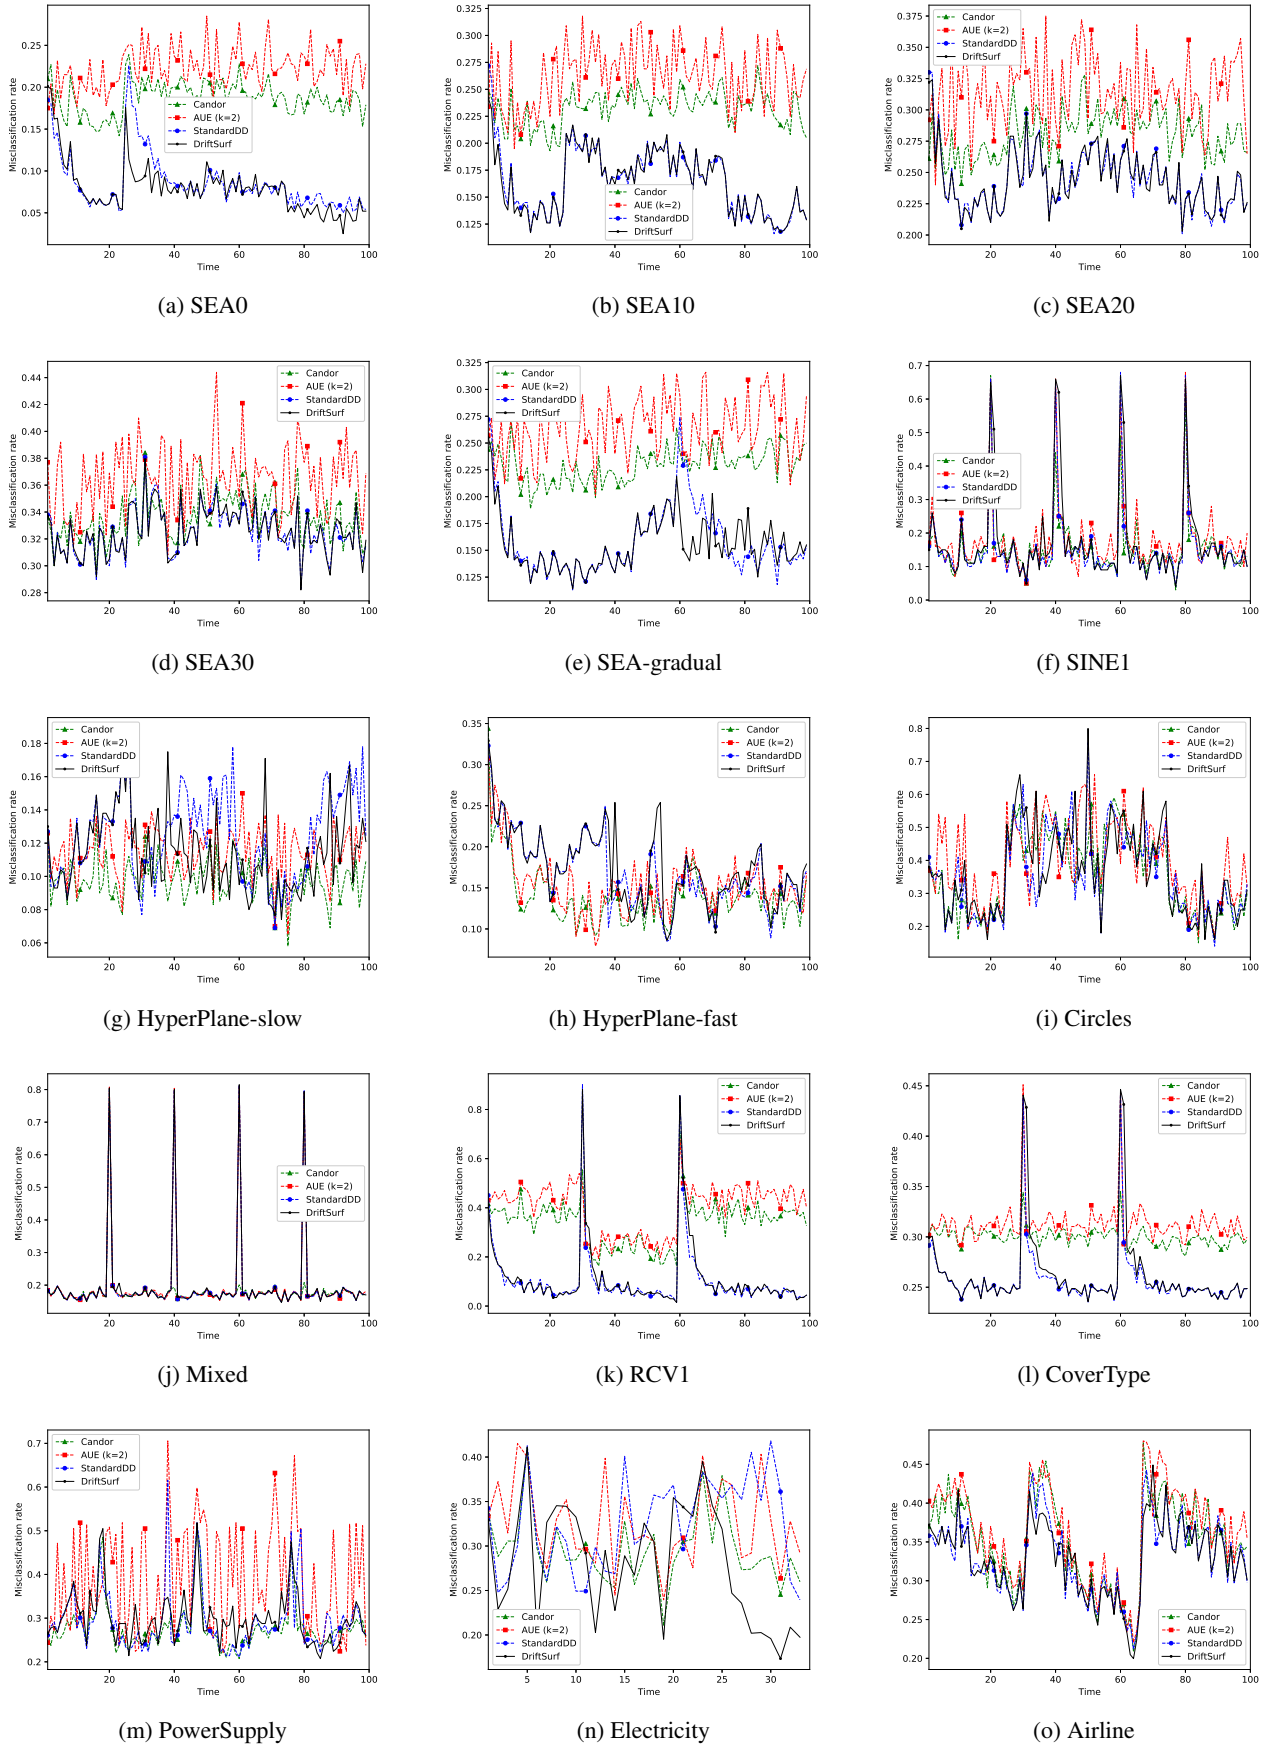

Figure 10: Misclassification rate over time ( $\rho = 4m$  divided among all models of each algorithm) comparing Aware, DriftSurf, AUE with  $k = 2$  and Candor

Table 9: Total average of misclassification rate ( $\rho = 4m$  divided among all models of each algorithm)

| DATASET     | Aware | DriftSurf    | StandardDD   | MDDM-G       | AUE   | AUE ( $k=2$ ) | CONDOR       | PL           |
|-------------|-------|--------------|--------------|--------------|-------|---------------|--------------|--------------|
| SEA0        | 0.120 | <b>0.084</b> | 0.091        | 0.092        | 0.179 | 0.226         | 0.192        | 0.085        |
| SEA10       | 0.179 | 0.167        | 0.169        | <b>0.160</b> | 0.218 | 0.269         | 0.234        | <b>0.160</b> |
| SEA20       | 0.256 | 0.247        | 0.247        | 0.258        | 0.280 | 0.320         | 0.283        | <b>0.242</b> |
| SEA30       | 0.334 | <b>0.327</b> | <b>0.327</b> | 0.341        | 0.342 | 0.365         | 0.338        | 0.338        |
| SEA-GRADUAL | 0.170 | <b>0.159</b> | 0.162        | 0.160        | 0.215 | 0.267         | 0.232        | 0.161        |
| HYPER-SLOW  | 0.145 | 0.119        | 0.128        | 0.132        | 0.158 | 0.120         | <b>0.103</b> | 0.117        |
| HYPER-FAST  | 0.222 | 0.177        | 0.171        | 0.154        | 0.238 | 0.154         | <b>0.144</b> | 0.191        |
| SINE1       | 0.149 | 0.176        | 0.158        | <b>0.157</b> | 0.263 | 0.181         | 0.159        | 0.192        |
| MIXED       | 0.188 | 0.201        | 0.200        | 0.200        | 0.254 | 0.203         | <b>0.182</b> | 0.217        |
| CIRCLES     | 0.345 | 0.365        | 0.357        | <b>0.341</b> | 0.372 | 0.424         | 0.360        | 0.370        |
| RCV1        | 0.101 | 0.116        | <b>0.110</b> | 0.113        | 0.310 | 0.404         | 0.341        | 0.137        |
| COVERTYPE   | 0.260 | 0.264        | <b>0.259</b> | 0.302        | 0.301 | 0.314         | 0.303        | 0.287        |
| AIRLINE     | 0.335 | <b>0.330</b> | 0.333        | 0.337        | 0.360 | 0.366         | 0.353        | 0.332        |
| ELECTRICITY | 0.310 | <b>0.289</b> | 0.332        | 0.324        | 0.348 | 0.326         | 0.300        | <b>0.289</b> |
| POWERSUPPLY | 0.303 | 0.300        | 0.294        | 0.292        | 0.284 | 0.393         | <b>0.282</b> | 0.300        |

Table 10: Total average of misclassification rate ( $\rho = 2m$  divided among all models of each algorithm)

| DATASET     | Aware | DriftSurf    | StandardDD   | MDDM-G       | AUE   | AUE ( $k=2$ ) | CONDOR       | PL    |
|-------------|-------|--------------|--------------|--------------|-------|---------------|--------------|-------|
| SEA0        | 0.133 | 0.094        | 0.097        | <b>0.089</b> | 0.201 | 0.230         | 0.200        | 0.131 |
| SEA10       | 0.197 | <b>0.161</b> | 0.163        | 0.183        | 0.237 | 0.275         | 0.238        | 0.194 |
| SEA20       | 0.266 | <b>0.249</b> | 0.253        | 0.283        | 0.291 | 0.327         | 0.292        | 0.271 |
| SEA30       | 0.352 | <b>0.337</b> | 0.339        | 0.360        | 0.354 | 0.381         | 0.345        | 0.352 |
| SEA-GRADUAL | 0.174 | <b>0.160</b> | 0.161        | 0.172        | 0.24  | 0.273         | 0.239        | 0.188 |
| HYPER-SLOW  | 0.117 | 0.130        | 0.117        | <b>0.116</b> | 0.191 | 0.166         | 0.122        | 0.185 |
| HYPER-FAST  | 0.191 | 0.188        | 0.168        | <b>0.164</b> | 0.278 | 0.211         | 0.166        | 0.222 |
| SINE1       | 0.168 | 0.209        | 0.180        | <b>0.178</b> | 0.309 | 0.246         | 0.179        | 0.207 |
| MIXED       | 0.191 | 0.204        | 0.204        | 0.204        | 0.259 | 0.204         | <b>0.182</b> | 0.229 |
| CIRCLES     | 0.368 | <b>0.369</b> | 0.380        | 0.372        | 0.401 | 0.415         | 0.384        | 0.388 |
| RCV1        | 0.120 | 0.143        | <b>0.128</b> | 0.131        | 0.403 | 0.467         | 0.401        | 0.195 |
| COVERTYPE   | 0.267 | 0.271        | <b>0.267</b> | 0.313        | 0.317 | 0.330         | 0.312        | 0.280 |
| AIRLINE     | 0.338 | 0.348        | <b>0.338</b> | 0.351        | 0.369 | 0.380         | 0.365        | 0.369 |
| ELECTRICITY | 0.311 | <b>0.308</b> | 0.319        | 0.339        | 0.364 | 0.363         | 0.313        | 0.354 |
| POWERSUPPLY | 0.311 | <b>0.307</b> | 0.311        | 0.309        | 0.313 | 0.463         | 0.338        | 0.342 |

only 1/10 of the models for MDDM and Aware. DriftSurf now dominates AUE in average misclassification rate on each dataset except for PowerSupply. The relative performance of PL to DriftSurf is generally similar in the  $\rho = 4m$  case, but in the  $\rho = 2m$  case, PL does relatively worse, losing its edge on Electricity and the SEA datasets. Because PL only gives a new model one chance to perform well before discarding it, the restricted training iterations of the new model makes it significantly harder to adapt.

We observe DriftSurf compares favorably to MDDM and StandardDD on the same datasets as it did in the undivided  $\rho$  case. However, MDDM's and StandardDD's advantages are magnified on SINE1 and RCV1, the datasets with sharp drifts that were clear to detect, and when immediate switching to the new model was desired. On PowerSupply, we observe that the false positives are not as punitive for MDDM and StandardDD as before, because their relative additional training per model means that their new models catch up faster. For Hyperplane-fast, the relative additional training for MDDM was advantageous. We suspect that when fewer computational steps are available, it is no longer desirable to create new models (which take longer to warm up) so frequently as MDDM did in the  $\rho = 4m$  case where it outperformed DriftSurf.

In Tables 9 and 10, we present results for a variation on AUE that is limited to only two experts, which we refer to as AUE ( $k = 2$ ). In our comparison of each algorithm when enforcing equal computation time, dividing the  $\rho$  steps equally among a total of ten experts in the original AUE is unsurprisingly detrimental to its performance. An alternative comparison is to reduce the total number of experts so that in AUE ( $k = 2$ ), each of the two experts is updated with  $\rho = 2m$  steps, identical

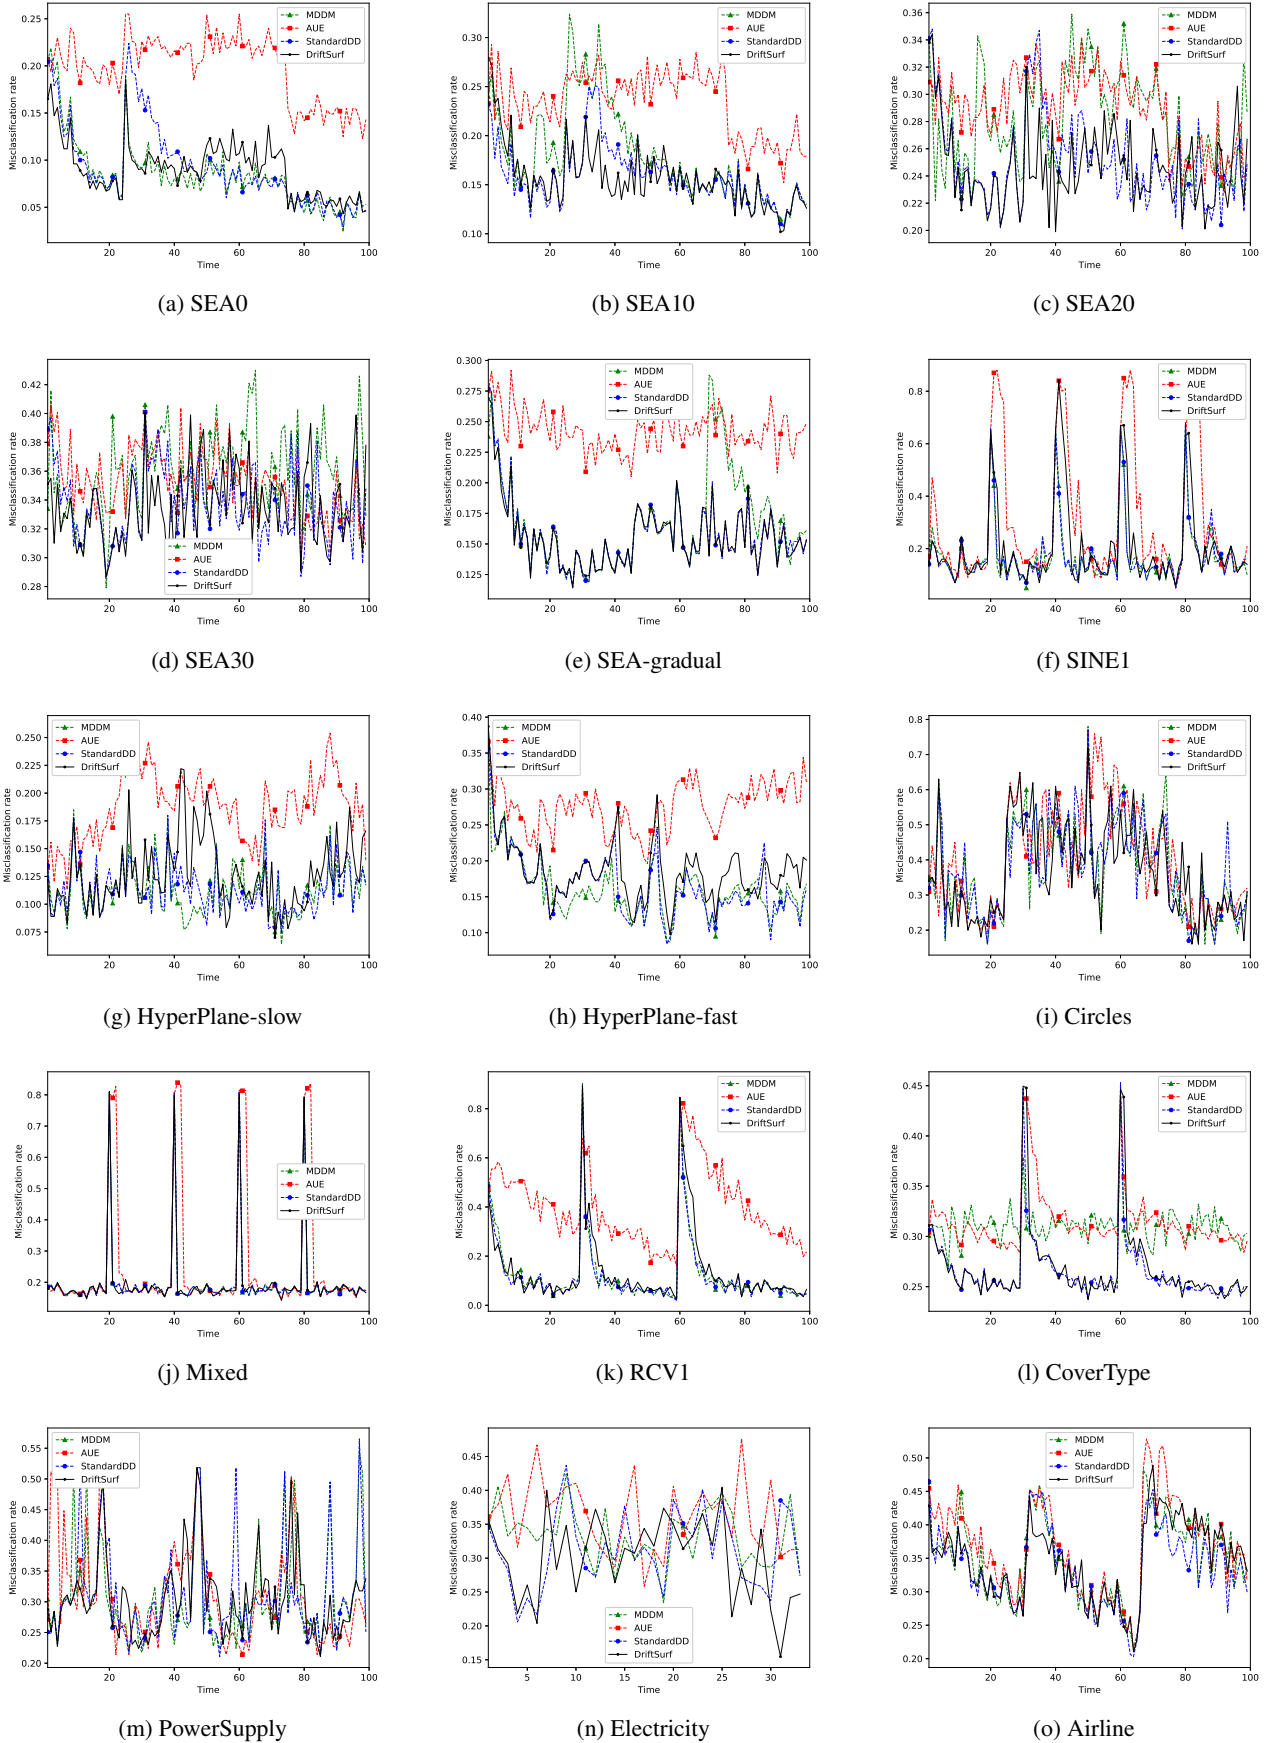
 Figure 11: Misclassification rate over time ( $\rho = 2m$  divided among all models of each algorithm)

to DriftSurf. We observe that AUE ( $k = 2$ ) performs better than AUE on five datasets: Hyperplane-slow, Hyperplane-fast, SINE1, Mixed, and Electricity. We previously mentioned that for Hyperplane, the continual drift means always using the latest available model works well, and we mentioned that for Electricity, the drift that does not require adaptation means always using the oldest available model works well. Therefore, on these datasets, the additional eight experts of the original AUE have little utility and AUE ( $k = 2$ ) performs better. The reason for improvement of AUE ( $k = 2$ ) on SINE1 and Mixed datasets is less clear, but we suspect that the additional experts of the original AUE penalize the accuracy immediately after the abrupt drifts when it is desirable to assign the most weight to the newest expert.

In Tables 9 and 10, we present results for another ensemble method Condor, which is better suited for the setting studied in this section normalizing the computational power because it only requires training a single model at a time. Another distinctive feature of Condor is that it uses biased regularization during training to anchor the newest model closer to the weighted ensemble average from the previous time step. For these two factors, we expect that Condor is better at adapting to drift at the expense of stationary performance, which is exemplified by its high accuracy on the Mixed, PowerSupply and the continually drifting Hyperplane datasets and its relative improvement over AUE on some other datasets including SINE1, Circles, Airline, Electricity and PowerSupply.

### D.3. Sensitivity Analysis of $\delta$

Choosing the right threshold is a key challenge for any drift detection technique. However, one of the key strengths of DriftSurf is its resilience to imprecision in detection. In this experiment, we compared DriftSurf to StandardDD (the baseline drift detection algorithm that uses condition 2 to decide whether to reset the model) under a range of settings of  $\delta$  and plotted the misclassification rate for each dataset in Figure 12.

As we observed in §6 from the results averaged over the datasets in Figure 3, we can generally choose a small value of  $\delta$  in DriftSurf to detect subtle drifts while not sacrificing performance between drifts because the reactive state catches most false positives.

Over all variations of the SEA dataset, RCV1, Electricity, and Airline, larger values of  $\delta$  improve the performance since the permitted variation within the results will not be mistaken as drifts. This is true for both StandardDD, especially, while DriftSurf’s performance is more stable because the reactive state corrects the false positive detections either by switching to the old model or by early exiting.

For the Hyperplane datasets (fast and slow) with continuous gradual drifts, StandardDD outperforms DriftSurf because resetting the model after any drift detection tends to improve the performance. There is an exception to this for the Hyperplane-slow under very small  $\delta$ , where the reactive state length of DriftSurf limits excessive switching. As  $\delta$  increases, neither DriftSurf and StandardDD detect changes, and as a result, they perform the same.

In some other datasets with large, abrupt drifts (SINE1, Mixed, CoverType), StandardDD outperforms DriftSurf, especially for larger values for  $\delta$ . In such cases, the right thing to do is to reset the model, but DriftSurf suffers from a delayed reaction to such drifts it has to enter reactive state and leave the reactive state with a new model. These delays in reacting to actual drifts make StandardDD outperform DriftSurf even for smaller choices of  $\delta$  on SINE1.

### D.4. Evaluation of Greedy Reactive State

This section includes results for the comparison of DriftSurf to DriftSurf (no-greedy). Recall that DriftSurf uses greedy prediction in the reactive state, meaning that the predictive model used at one time step is the model with better performance from the previous time step, while DriftSurf (no-greedy) only uses the older model during the reactive state, and may only switch to the new model at the end of the reactive state. In Table 11 we observe that DriftSurf performs similar or better across each dataset, with the biggest improvements on the SINE1, RCV1, and Mixed datasets that we earlier observed MDDM and Aware perform well on because it is desirable to immediately switch to the new model after the large, abrupt drift.

### D.5. Comparison to 1PASS-SGD and Oblivious

Figure 13 shows the comparison to 1PASS-SGD and the oblivious algorithm (OBL) for the RCV1 and Electricity datasets at each time. The time average misclassification rate for each dataset are in Table 8. In the case of the large, abrupt drift in RCV1, we observe that 1PASS-SGD and especially oblivious have poor performance after drift. The oblivious algorithm



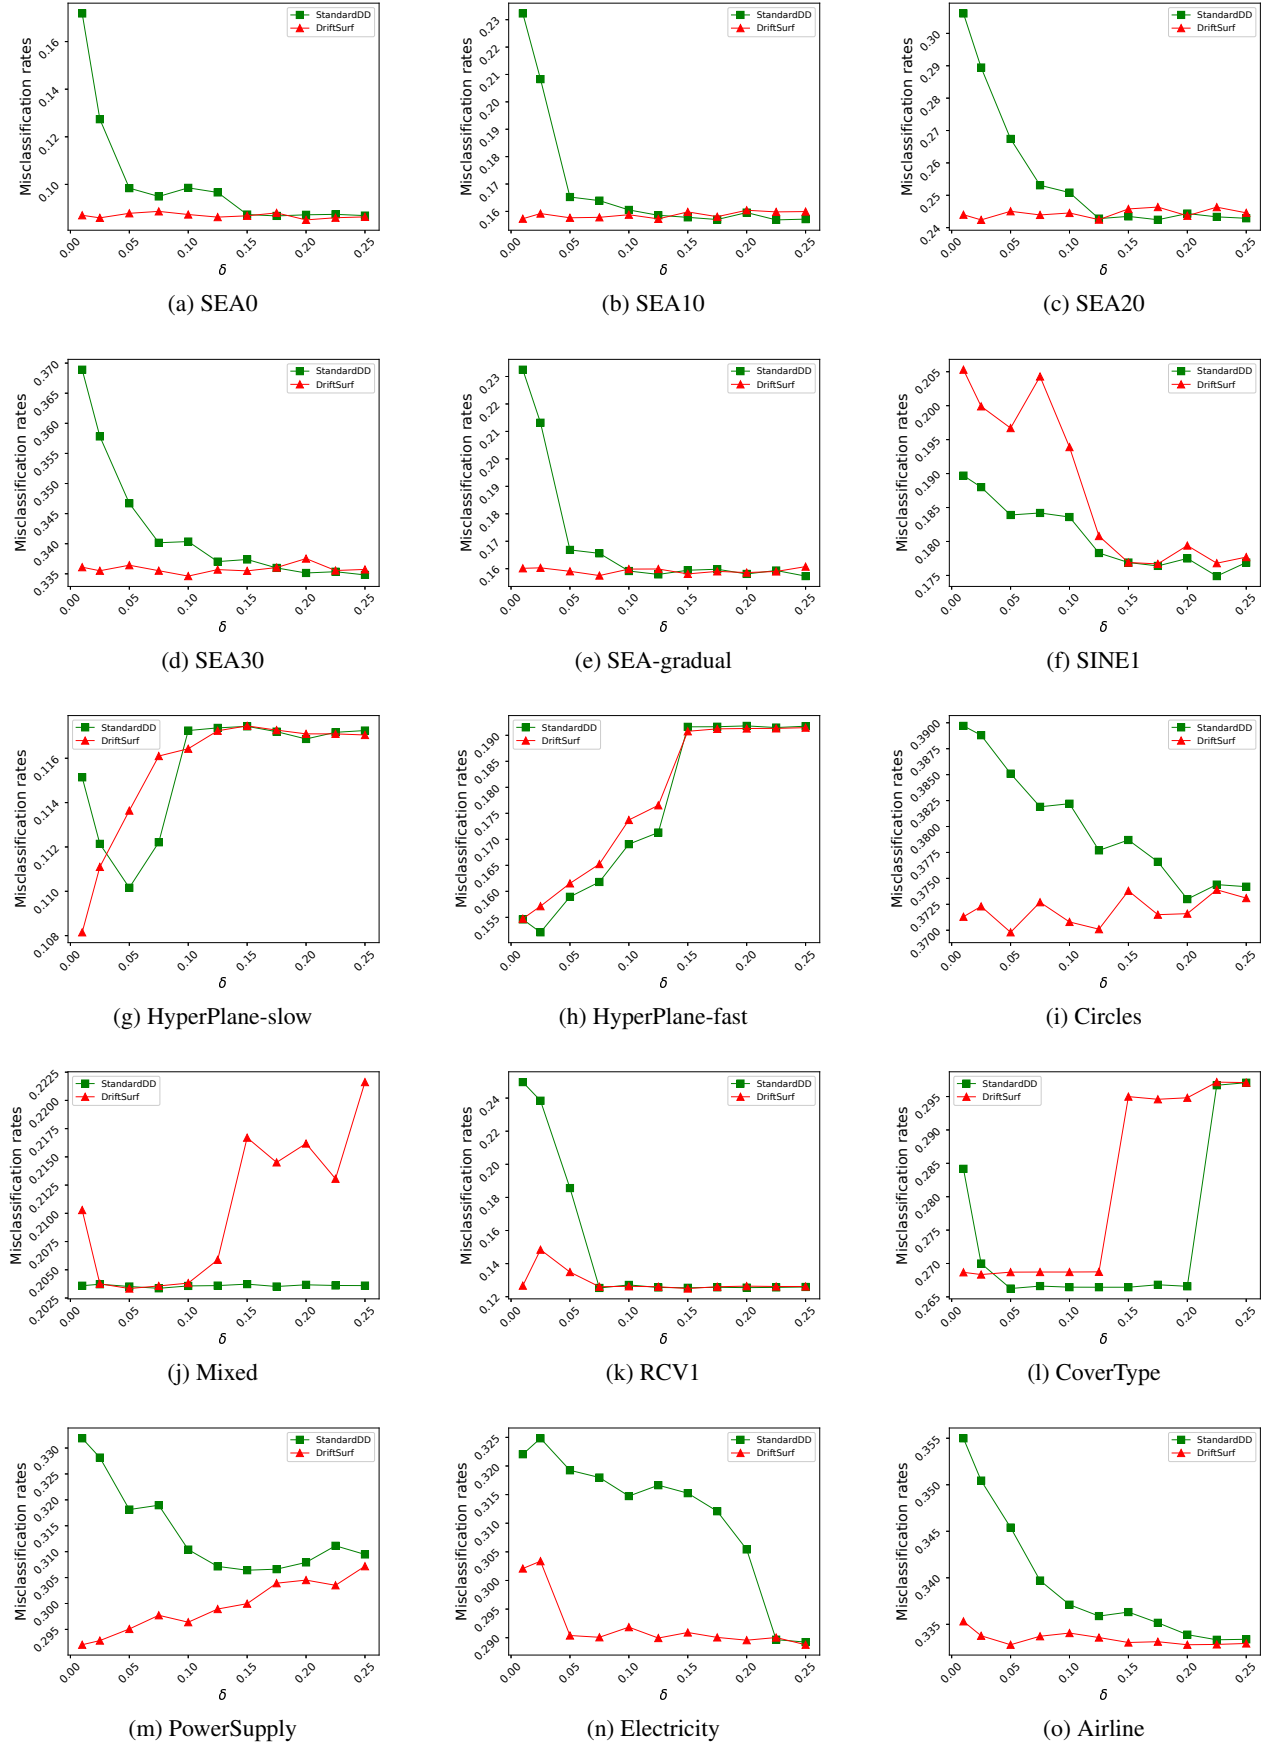
 Figure 12:  $\delta$ -sensitivity ( $\rho = 2m$  for each model)

Table 11: Total average of misclassification rate - DriftSurf vs DriftSurf (no-greedy) ( $\rho = 2m$  for each model)

| DATASET     | DriftSurf    | DriftSurf (NO-GREEDY) |
|-------------|--------------|-----------------------|
| SEA0        | 0.087        | <b>0.085</b>          |
| SEA10       | 0.161        | <b>0.158</b>          |
| SEA20       | 0.247        | <b>0.246</b>          |
| SEA30       | <b>0.335</b> | 0.336                 |
| SEA-GRADUAL | <b>0.158</b> | 0.159                 |
| HYPER-SLOW  | <b>0.117</b> | 0.118                 |
| HYPER-FAST  | <b>0.173</b> | 0.177                 |
| SINE1       | <b>0.191</b> | 0.220                 |
| MIXED       | <b>0.204</b> | 0.238                 |
| CIRCLES     | <b>0.371</b> | 0.376                 |
| RCV1        | <b>0.134</b> | 0.158                 |
| COVERTYPE   | <b>0.267</b> | 0.273                 |
| AIRLINE     | <b>0.333</b> | <b>0.333</b>          |
| ELECTRICITY | <b>0.284</b> | 0.287                 |
| POWERSUPPLY | <b>0.303</b> | <b>0.303</b>          |

continues to re-sample the data from the older distributions, and leads to a model with random, or worse than random, accuracy on the current distribution. Even for 1PASS-SGD, which only trains over data from the most recent time step, we observe its convergence rate is slow after a drift, where its previous training on the old data still hinders it. On the Electricity data with a more subtle drift, we observe that oblivious is actually the best performing algorithm, as discussed earlier, because data from all over time can be trained and fit by a single model. However, 1PASS-SGD still has lower accuracy because, as a single pass method, it uses only  $m$  update steps at each time even when  $\rho = 2m$  are available to the other algorithms, and also because SGD has a slower convergence rate than the variance-reduced method STRSAGA.

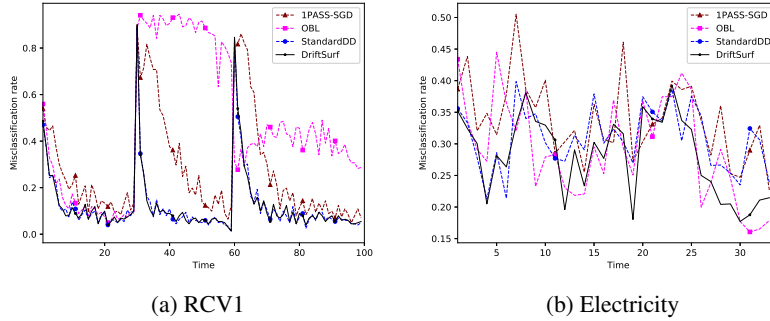
 Figure 13: Misclassification rate over time ( $\rho = 2m$  for each model)

## D.6. Using SGD as the Update Process

As mentioned earlier we choose STRSAGA as the update process because of two main reasons: (i) STRSAGA is designed in a way that can handle different arrival distributions, and (ii) it achieves a faster convergence rate because of using variance-reduced update step. We study the impact of the choice of the update process on the performance. We re-run the previous experiments using SGD instead of STRSAGA. Table 12 shows the average misclassification rate for the case where  $\rho = 2m$  update steps are used for each model.

As the results presented in Table 12 suggest, AUE, unlike the previous experiment, outperforms MDDM and DriftSurf for the majority of the studied datasets. The reason is that AUE mitigates the high variance of SGD. MDDM, StandardDD, and DriftSurf all use performance-degradation for drift detection. Such drift detection is sensitive to the high variance during the training which may be mistaken for drift in the underlying distribution. However, comparing the results of DriftSurf and MDDM shows the advantage of going through a reactive state before restarting the model in reducing the false positive



Table 12: Total average of misclassification rate - update process: SGD ( $\rho = 2m$  for each model)

| DATASET     | Aware | DriftSurf    | StandardDD   | MDDM-G       | AUE          |
|-------------|-------|--------------|--------------|--------------|--------------|
| SEA0        | 0.170 | 0.119        | <b>0.115</b> | 0.127        | 0.125        |
| SEA10       | 0.217 | 0.186        | 0.191        | 0.197        | <b>0.184</b> |
| SEA20       | 0.279 | 0.271        | 0.276        | 0.296        | <b>0.263</b> |
| SEA30       | 0.360 | 0.352        | 0.360        | 0.382        | <b>0.340</b> |
| SEA-GRADUAL | 0.205 | <b>0.179</b> | 0.193        | 0.216        | 0.188        |
| HYPER-SLOW  | 0.169 | 0.155        | 0.146        | 0.140        | <b>0.124</b> |
| HYPER-FAST  | 0.272 | 0.201        | 0.203        | <b>0.179</b> | 0.204        |
| SINE1       | 0.194 | <b>0.199</b> | 0.216        | 0.200        | 0.239        |
| MIXED       | 0.194 | <b>0.207</b> | 0.209        | 0.209        | 0.242        |
| CIRCLES     | 0.362 | 0.389        | 0.390        | 0.386        | <b>0.362</b> |
| RCV1        | 0.151 | <b>0.154</b> | 0.155        | 0.162        | 0.208        |
| COVERTYPE   | 0.274 | 0.276        | <b>0.273</b> | 0.326        | 0.286        |
| AIRLINE     | 0.356 | 0.351        | 0.353        | 0.359        | <b>0.343</b> |
| ELECTRICITY | 0.335 | 0.337        | 0.359        | 0.348        | <b>0.299</b> |
| POWERSUPPLY | 0.350 | 0.321        | 0.390        | 0.365        | <b>0.300</b> |

 Table 13: Total average of misclassification rate - update process: SGD ( $\rho = 2m$  divided among all models of each algorithm)

| DATASET     | Aware | DriftSurf    | StandardDD   | MDDM-G       | AUE          |
|-------------|-------|--------------|--------------|--------------|--------------|
| SEA0        | 0.163 | 0.127        | 0.125        | <b>0.123</b> | 0.193        |
| SEA10       | 0.229 | <b>0.186</b> | 0.198        | 0.197        | 0.238        |
| SEA20       | 0.283 | <b>0.267</b> | 0.279        | 0.311        | 0.287        |
| SEA30       | 0.366 | <b>0.353</b> | 0.355        | 0.376        | 0.358        |
| SEA-GRADUAL | 0.204 | <b>0.187</b> | 0.188        | 0.196        | 0.236        |
| HYPER-SLOW  | 0.169 | 0.155        | 0.149        | <b>0.143</b> | 0.158        |
| HYPER-FAST  | 0.269 | 0.211        | 0.191        | <b>0.185</b> | 0.274        |
| SINE1       | 0.200 | 0.241        | 0.212        | <b>0.205</b> | 0.302        |
| MIXED       | 0.195 | 0.207        | <b>0.206</b> | 0.209        | 0.262        |
| CIRCLES     | 0.306 | 0.371        | 0.389        | <b>0.367</b> | 0.429        |
| RCV1        | 0.146 | 0.168        | <b>0.156</b> | 0.161        | 0.437        |
| COVERTYPE   | 0.275 | 0.282        | <b>0.275</b> | 0.323        | 0.316        |
| AIRLINE     | 0.354 | 0.365        | <b>0.353</b> | 0.366        | 0.370        |
| ELECTRICITY | 0.343 | <b>0.316</b> | 0.342        | 0.350        | 0.354        |
| POWERSUPPLY | 0.336 | 0.318        | 0.348        | 0.356        | <b>0.316</b> |

rate of drift detection. AUE, on the other hand, overcomes the high variance of SGD by using a bag of experts and making ensemble based decisions.

Similar to the previous experiments, to examine the accuracy achieved when enforcing equal processing time, we repeated the experiment for the case where  $\rho = 2m$  steps are used by each algorithm and divided among its models. Reported results in Table 13 suggest that the variance-reduction effect of AUE is not able to overcome the limited training.

STRSAGA because of its variance-reduced update step achieves a faster convergence rate in comparison to SGD. Difference between the reported results in Table 8 and Table 12 confirms the advantage of using STRSAGA over SGD as the update process.

#### D.7. Using Hoeffding Trees and Naive Bayes as Base Learners

For the experiments in §D.1–§D.6, the base learner across each algorithm is a logistic regression model using either STRSAGA or SGD as the update process. In this section, we study two additional base learners: Hoeffding Trees (HT), and Naive Bayes (NB).

When using HT as the base learner, we also compare against an additional adaptive learning algorithm, Hoeffding Adaptive

Table 14: Total average of misclassification rate - base learner: HT ( $\rho = 2m$  divided among all models of each algorithm)

| DATASET     | Aware | DriftSurf    | StandardDD   | MDDM-G       | AUE          | HAT          |
|-------------|-------|--------------|--------------|--------------|--------------|--------------|
| SEA0        | 0.038 | <b>0.032</b> | <b>0.032</b> | 0.045        | 0.053        | 0.037        |
| SEA10       | 0.139 | <b>0.134</b> | 0.136        | 0.139        | 0.143        | 0.140        |
| SEA20       | 0.233 | <b>0.230</b> | 0.231        | 0.231        | 0.234        | 0.233        |
| SEA30       | 0.327 | <b>0.324</b> | 0.329        | 0.329        | 0.327        | 0.326        |
| SEA-GRADUAL | 0.141 | 0.133        | 0.135        | <b>0.131</b> | 0.148        | 0.135        |
| HYPER-SLOW  | 0.162 | 0.140        | 0.126        | 0.153        | <b>0.123</b> | 0.149        |
| HYPER-FAST  | 0.245 | 0.173        | <b>0.159</b> | 0.168        | 0.162        | 0.173        |
| SINE1       | 0.170 | 0.194        | <b>0.176</b> | <b>0.176</b> | 0.251        | 0.329        |
| MIXED       | 0.178 | 0.192        | 0.193        | <b>0.191</b> | 0.240        | 0.195        |
| CIRCLES     | 0.191 | <b>0.173</b> | 0.182        | 0.178        | 0.184        | 0.186        |
| RCV1        | 0.139 | 0.158        | <b>0.142</b> | 0.177        | 0.171        | 0.188        |
| COVERTYPE   | 0.226 | <b>0.221</b> | 0.238        | 0.261        | 0.251        | <b>0.221</b> |
| AIRLINE     | 0.388 | 0.378        | 0.377        | 0.379        | 0.378        | <b>0.376</b> |
| ELECTRICITY | 0.260 | 0.255        | 0.274        | 0.265        | <b>0.248</b> | 0.268        |
| POWERSUPPLY | 0.286 | 0.283        | 0.279        | 0.281        | 0.282        | <b>0.276</b> |

Table 15: Total average of misclassification rate - base learner: NB

| DATASET     | Aware | DriftSurf    | StandardDD   | MDDM-G       | AUE          |
|-------------|-------|--------------|--------------|--------------|--------------|
| SEA0        | 0.062 | 0.056        | 0.055        | 0.083        | <b>0.054</b> |
| SEA10       | 0.150 | 0.144        | <b>0.143</b> | 0.144        | <b>0.143</b> |
| SEA20       | 0.239 | 0.235        | <b>0.233</b> | <b>0.233</b> | 0.234        |
| SEA30       | 0.328 | 0.326        | 0.323        | 0.325        | <b>0.324</b> |
| SEA-GRADUAL | 0.154 | <b>0.147</b> | 0.148        | <b>0.147</b> | <b>0.147</b> |
| HYPER-SLOW  | 0.146 | 0.118        | 0.110        | 0.131        | <b>0.109</b> |
| HYPER-FAST  | 0.257 | 0.161        | <b>0.148</b> | 0.160        | 0.151        |
| SINE1       | 0.166 | 0.203        | 0.176        | <b>0.171</b> | 0.238        |
| MIXED       | 0.180 | <b>0.193</b> | <b>0.193</b> | <b>0.193</b> | 0.254        |
| CIRCLES     | 0.187 | <b>0.174</b> | <b>0.174</b> | 0.177        | 0.178        |
| RCV1        | 0.124 | 0.131        | 0.138        | <b>0.130</b> | 0.150        |
| COVERTYPE   | 0.311 | 0.314        | <b>0.310</b> | 0.311        | 0.312        |
| AIRLINE     | 0.386 | 0.379        | 0.377        | 0.378        | <b>0.376</b> |
| ELECTRICITY | 0.274 | <b>0.259</b> | 0.263        | 0.262        | <b>0.259</b> |
| POWERSUPPLY | 0.284 | <b>0.278</b> | <b>0.278</b> | <b>0.278</b> | 0.284        |

Tree (HAT) (Bifet & Gavaldà, 2009). HAT continually maintains the starting HT throughout time, but reacts to drift by swapping out subtrees based on an internal drift detection module. This represents a more granular approach to adapting to drift, compared to replacing the entire model in traditional drift detection. We use the implementation of HAT available in scikit-multiflow using their default hyperparameters (Montiel et al., 2018).

The results when using HT are shown in Table 14 for the setting where the computation available to each algorithm is divided among all its models. Note, however, that HAT is a single-pass algorithm, and only used half the number of available update steps that each other algorithm used. We observe that DriftSurf is an effective algorithm for this base learner, too. As we saw with other base learners, DriftSurf performs especially well on RCV1 and CoverType where it quickly switches to a new model after the drift and concentrates its processing power on the new model, but that DriftSurf loses to the large ensemble that AUE has on the continually drifting Hyperplane datasets. We observe that HAT’s granular adaptation to drift compares favorably on the real datasets of Airline and Powersupply, but suffers on the sharpest drifts like in SINE1 and RCV1. For the NB base learner, the results are shown in Table 15. With NB, there is no advantage to repeated sampling of earlier visited points, and so we compare each algorithm as they run a single pass over the data. In this setting, AUE’s ensemble of 10 experts is the overall best-performer, using more computation than DriftSurf and MDDM, although AUE was the slowest at adapting to the sharp drifts on SINE1 and RCV1.

### D.8. Recovery Time Analysis

In this paper, we defined *recovery time* as the number of time steps after a drift before switching to a model trained only over the new distribution. However, an alternative metric for recovery we consider in this section is the 95%-recovery-time metric proposed by (Shaker & Hüllermeier, 2015). The 95%-recovery-time is the length of a time interval called the recovery phase. The recovery phase starts when the predictive model’s performance drops below 95% of the performance attained over the first distribution, and the recovery phase ends when the model’s performance recovers up to 95% of the performance curve that is ultimately obtained over the new distribution.

Table 16 shows the 95%-recovery-time over each dataset. When there is more than one drift in a dataset, the reported recovery time is the average over all the drifts. Note that no recovery time is reported for Hyperplane datasets because they contain a continually gradual drift that last throughout the entire stream, and the metric is not defined for such drifts.

The recovery time in some cases is reported to be 0. This is because the performance never dropped below 95% of the performance curve over the original distribution. Also, it is worth mentioning that the recovery time of *Aware* is regularly longer the other algorithms (while under our definition of recovery, *Aware* recovers immediately by resetting the model at the time of drift). This occurs because restarting from scratch after a drift means that *Aware* always enters the recovery phase, while the other algorithms may not enter the recovery phase if their performances did not drop below 95% of that under the original distribution.

We observe that DriftSurf overall performs well on the 95%-recovery-time metric. On RCV1 and CoverType, DriftSurf outperforms AUE which takes several time steps to shift its weight towards the newer models. Furthermore, on CoverType, DriftSurf outperforms MDDM, which suffers significant false positives throughout the stream.

Table 16: 95%-recovery-time ( $\rho = 2m$  for each model)

| DATASET     | Aware | DriftSurf    | StandardDD   | MDDM-G       | AUE          |
|-------------|-------|--------------|--------------|--------------|--------------|
| SEA0        | 10.67 | <b>0.33</b>  | 3.67         | <b>0.33</b>  | <b>0.33</b>  |
| SEA10       | 9.33  | <b>0.33</b>  | <b>0.33</b>  | 6.00         | <b>0.33</b>  |
| SEA20       | 5.00  | <b>0.00</b>  | <b>0.00</b>  | 4.33         | <b>0.00</b>  |
| SEA30       | 2.33  | <b>0.33</b>  | <b>0.33</b>  | 3.00         | <b>0.33</b>  |
| SEA-GRADUAL | 4.50  | <b>0.00</b>  | <b>0.00</b>  | 7.00         | <b>0.00</b>  |
| SINE1       | 2.75  | <b>3.00</b>  | 3.25         | <b>3.00</b>  | 3.50         |
| MIXED       | 1.00  | <b>1.00</b>  | <b>1.00</b>  | <b>1.00</b>  | 2.00         |
| CIRCLES     | 1.00  | 1.00         | 1.00         | <b>0.83</b>  | 1.00         |
| RCV1        | 10.00 | <b>8.50</b>  | 11.50        | 9.50         | 13.50        |
| COVERTYPE   | 3.50  | <b>4.00</b>  | <b>4.00</b>  | 19.50        | 9.00         |
| AIRLINE     | 12.50 | <b>10.50</b> | <b>10.50</b> | <b>10.50</b> | <b>10.50</b> |
| ELECTRICITY | 1.00  | <b>0.00</b>  | <b>0.00</b>  | <b>0.00</b>  | <b>0.00</b>  |
| POWERSUPPLY | 3.00  | 1.33         | <b>1.00</b>  | 2.00         | 1.67         |
| AVG         | 5.12  | <b>2.33</b>  | 2.81         | 5.15         | 3.24         |
