# Supplementary material
Source: ML conference proceedings conference paper supplement (https://proceedings.mlr.press/v139/tahmasbi21a.html)
Supplement: Supplementary file 2 [file tahmasbi21a-supp.zip]

Archive with 2 entries (2 files):
- code.zip
- supp.pdf
